# Multi-CD: Multi-scale discovery of Chromatin Domains

Min Hyeok Kim<sup>1,\*</sup>, Ji Hyun Bak<sup>1,\*</sup>, Lei Liu<sup>1</sup>, and Changbong Hyeon<sup>1,†</sup>

<sup>1</sup>Korea Institute for Advanced Study, Seoul 02455, Korea; \*These two authors contributed equally.; †Correspondence: [hyeoncb@kias.re.kr](mailto:hyeoncb@kias.re.kr)

(Dated: January 25, 2019)

Identifying chromatin domains (CDs) from Hi-C data is currently a central problem in genome research. Here we present Multi-CD (<https://github.com/multi-cd>), a unified method to discover CDs at various genomic scales. Multi-CD integrates approaches from polymer physics, financial market fluctuation analysis, and Bayesian inference, and identifies multi-scale structures of CDs by clustering a global pattern manifested on a polymer-network-based cross-correlation matrix. The CD solutions from Multi-CD, validated against biological data as well as compared with the pattern of original Hi-C, demonstrate superiority over those from existing methods. The hierarchy quantified between four major families of CDs reveals the basic principles of chromatin organization: (i) Sub-TADs, TADs, and meta-TADs constitute a robust hierarchical structure. (ii) The assemblies of compartments and TAD-based domains are governed by distinct organizational principles. (iii) Sub-TADs are the common building blocks of chromosome architecture. The results from our unified algorithm not only provide general insight of chromatin organization, but also offer quantitative account for its cell-type-dependence and function.

Chromosome conformation capture (3C) and its derivatives, which are used to identify chromatin contacts through the proximity ligation techniques [1, 2], take center stage in studying the organization and function of chromosomes [3, 4]. It is particularly clear from the genome-wide interaction profiles of Hi-C data that details of chromosome architecture not only vary with cell type but also with the transcription activity and the phase of cell cycle, underscoring the functional roles of chromosome structure in gene expression and regulation [5–13]. Since pathological states of chromatin are also manifested in Hi-C [14, 15], accurate characterization of chromatin domains (CDs) from Hi-C data is of utmost importance.

Before discussing our new method and algorithm, we give a brief overview of the current knowledge on scale-dependent organization of chromatin [6, 16–21]. Chromosomes packaged inside the nucleus are first segregated into their own territories (Fig. 1a) [18]. At the scale of  $\gtrsim \mathcal{O}(10)$  Mb, alternating blocks of active and inactive chromatin are phase-separated into two main compartments constituted by crisscrossed interfacial interactions between megabase sized aggregates, called A- and B-compartments [16, 17, 20, 22] (Fig. 1b). Inter-chromosomal contact patterns based on high resolution Hi-C (5 kb [23], 25 kb [17]) have suggested more detailed clas-

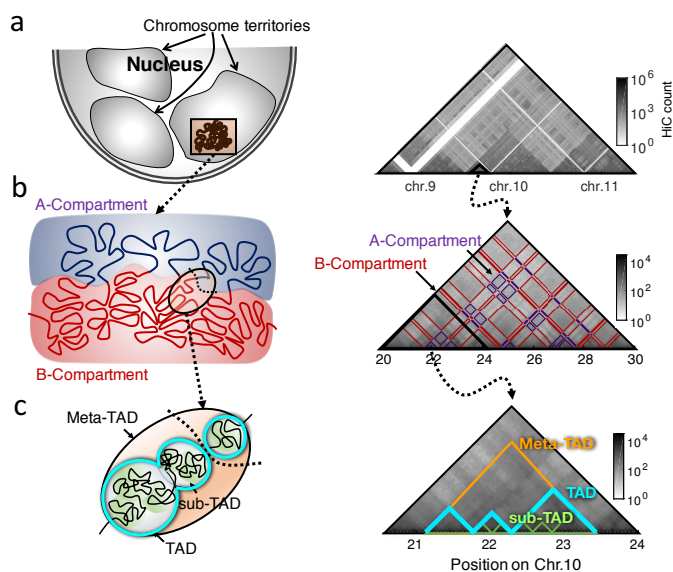

**Figure 1: The hierarchical organization of interphase chromosome and Hi-C maps at the corresponding scale. (a)** Chromosome territories in the cell nucleus, which are reflected as the higher intra-chromosomal counts in the Hi-C map. **(b)** Alternating blocks of active and inactive chromatin, segregated into A- and B-compartments, give rise to the checkerboard pattern on Hi-C. **(c)** Sub-megabase to megabase sized chromatin folds into TADs. Adjacent TADs are merged to meta-TAD, whereas individual TAD is further decomposed into sub-TADs.

sification of the compartments into at least six sub-compartments, A1, A2, B1, B2, B3 and B4, which were shown to be in good agreement with the finer details of epigenetic markers. Topologically associated domains (TADs) emerge at  $\sim \mathcal{O}(10^2)$  kb [24–27]. The TADs, whose domain boundaries are well conserved across cell/tissue types, are the basic functional unit of chromatin organization and gene regulation [18–21]. It was suggested that the proximal TADs in genomic neighborhood merge into a higher-order structural domain termed “meta-TAD” [6]. Conversely, at smaller genomic scale, each TAD is split into sub-structures called sub-TADs that display more localized contacts [17, 28–31] (Fig. 1c). It has recently been suggested that TADs and compartments are

shaped by two distinct mechanisms [32–35]; yet, more quantitative and direct evidence from Hi-C would lend support on such hypothesis.

Several different algorithms have been put forward for identifying the above-mentioned CDs from Hi-C [16, 17, 24]. However, these algorithms are optimized for differently formatted Hi-C data aiming at identifying CDs at a particular genomic scale [21, 24, 36], not developed for CD identification encompassing multiple genomic scales. Furthermore, to apply these algorithms, Hi-C data has to be reformatted to the scale of the target domains. Hi-C data preprocessing and algorithm adopted by these methods are based primarily on *local pattern recognition* analyses [16, 17, 24, 37], where the most critical physical constraint that chromosome is a long polymer folded into 3D structure is not taken into account [6, 38–43].

Here, we interpret Hi-C data as an outcome of the pairwise contact probability of polymer network with multiple crosslinks, and use the corresponding cross-correlation matrix as the sole input data for the CD identification algorithm at varying genomic scale (Multi-CD). The algorithm includes a tuning parameter which enables us to control the average domain size. We demonstrate the utility of Multi-CD by applying it to Hi-C data from various cell lines as well as to that of a particular cell line over multiple genomic scales. When the results are compared with the original pattern of Hi-C, the CD structures better match with the original Hi-C pattern than those determined from other methods. CD structures identified at multiple genomic scales are consistent with information from biomarkers. This study will show that amid the rapidly expanding volume of Hi-C data [10–12], Multi-CD holds good promise to more quantitative and accurate determination of chromatin organization.

## RESULTS

### Overview of Multi-CD

The primary goal of this study is to extract information of CDs from Hi-C data at varying genomic scale of interest. First, we translate the Hi-C data into a cross-correlation matrix of polymer network, by noting that chromosomes are in essence a polymer network with multiple cross-links [38, 44, 45]. In this case, the distance distribution between two loci  $i$  and  $j$  can be written in the gaussian form:

$$P(r_{ij}; \gamma_{ij}) \sim 4\pi r_{ij}^2 e^{-\gamma_{ij} r_{ij}^2},$$

with  $\gamma_{ij} = 1/2(\sigma_{ii} + \sigma_{jj} - 2\sigma_{ij})$ , where  $\sigma_{ij} (= \langle \delta \mathbf{r}_i \cdot \delta \mathbf{r}_j \rangle)$  is the positional covariance, determined by the topology of polymer network [45]. This polymer-based interpretation enables a one-to-one mapping from the contact probability  $p_{ij} = \int_0^{r_c} dx P(x; \gamma_{ij})$  to the positional covariance  $\sigma_{ij}$ , and hence to the cross-correlation matrix,  $(\mathbf{C})_{ij} = \sigma_{ij} / \sqrt{\sigma_{ii}\sigma_{jj}}$  (see [Methods](#)). The cross-correlation matrix  $\mathbf{C}$  normalizes the wide numerical range of the original Hi-C counts into the range between  $-1$  and  $1$ .

Clustering a correlation matrix into a finite number of correlated groups is a general problem discussed in diverse disciplines. Here, we adapted a formalism known as the “group model,” developed for identifying the correlated groups of companies from empirical data of stock market price fluctuations [46–48]. Without ambiguity, the formalism can be applied to our problem of clustering correlated genomic loci in a chromosome. For a given correlation matrix  $\mathbf{C}$ , the group model finds the optimal solution of clustered loci groups (domains) that best explains the pattern manifested in  $\mathbf{C}$ . The domain solution for  $N$  loci can be written as a vector  $\mathbf{s} = \{s_1, s_2, \dots, s_N\}$ , where  $s_i$  indicates the domain index for locus  $i$ . Technically, this procedure involves finding a vector  $\mathbf{s}$  that maximizes the posterior distribution  $p(\mathbf{s}|\mathbf{C})$  for a given correlation data  $\mathbf{C}$ ; the optimal CD solution is found as  $\mathbf{s}^* = \text{argmax}_{\mathbf{s}} p(\mathbf{s}|\mathbf{C})$ . Maximizing the posterior distribution in the form of  $p(\mathbf{s}|\mathbf{C}) \propto e^{-\mathcal{H}(\mathbf{s}|\mathbf{C})/T}$  is equivalent to minimizing the cost function (or the effective Hamiltonian)  $\mathcal{H}(\mathbf{s}|\mathbf{C})$ . We consider the cost function of the form  $\mathcal{H}(\mathbf{s}|\mathbf{C}) = \mathcal{E}(\mathbf{s}|\mathbf{C}) + \lambda \mathcal{K}(\mathbf{s})$ , where  $\mathcal{E}(\mathbf{s}|\mathbf{C})$  quantifies the goodness of clustering, and  $\mathcal{K}(\mathbf{s})$  with  $\lambda (\geq 0)$  promotes simpler CD solutions by penalizing the effective number of clusters (see [Methods](#)). This gives a “tunable” group model, such that we can flexibly control the average size of domain solutions by changing the parameter  $\lambda$ . In light of the grand-canonical ensemble in statistical mechanics,  $T$  is the effective *temperature* of the system, and  $\lambda$  amounts to the *chemical potential*. Our “tunable group model,” applied to Hi-C data can discover the four major CD families, namely, sub-TADs, TADs, meta-TADs, and compartments.

### Discovery of chromatin domains at multiple scales

We applied Multi-CD to 50 kb resolution Hi-C of chromosome 10 from five different cell lines: GM12878, HUVEC, NHEK, K562, KBM7 ([Fig. 2a-b](#)). Given a Hi-C matrix, we first obtained the cross-correlation matrix  $\mathbf{C}$  ([Fig. 2c](#)), and used Multi-CD to identify a set of CDs for each fixed value of  $\lambda$  ([Fig. 2d](#)). This resulted in a family of CD solutions at varying  $\lambda$ , with coarser CDs at larger values of  $\lambda$ . Interestingly, the family of CD solutions for a given cell line were divided into two regimes. In the case of GM12878 ([Fig. 2e](#)), CD solutions can be partitioned into two groups below and above  $\lambda \approx 40$ . Solution families for other four cell lines were also similarly divided ([Fig. S1](#)).

We note several points based on Multi-CD analyses for all five cell lines:

- (i) In each of the cells, the average domain size  $\langle n \rangle$  increased monotonically with  $\lambda$  ([Fig. 2f](#)).
- (ii) There is a crossover point at  $\lambda = \lambda_{cr}$  where the distribution of domain sizes suddenly changes. The variability of domain size, quantified in terms of the index of dispersion,  $D (= \sigma_n^2 / \langle n \rangle)$ , is below 1 for small  $\lambda (< \lambda_{cr})$ , which means that the domain size is regular, but it exhibits transition at  $\lambda_{cr} \approx 30 - 40$  ( $\langle n \rangle_{cr} \approx 1.6$  Mb) for GM12878, HUVEC, and NHEK; and at  $\lambda_{cr} \approx 60 - 70$  ( $\langle n \rangle_{cr} \approx 2.2$  Mb) for K562 and KBM7 ([Fig. 2g](#)).

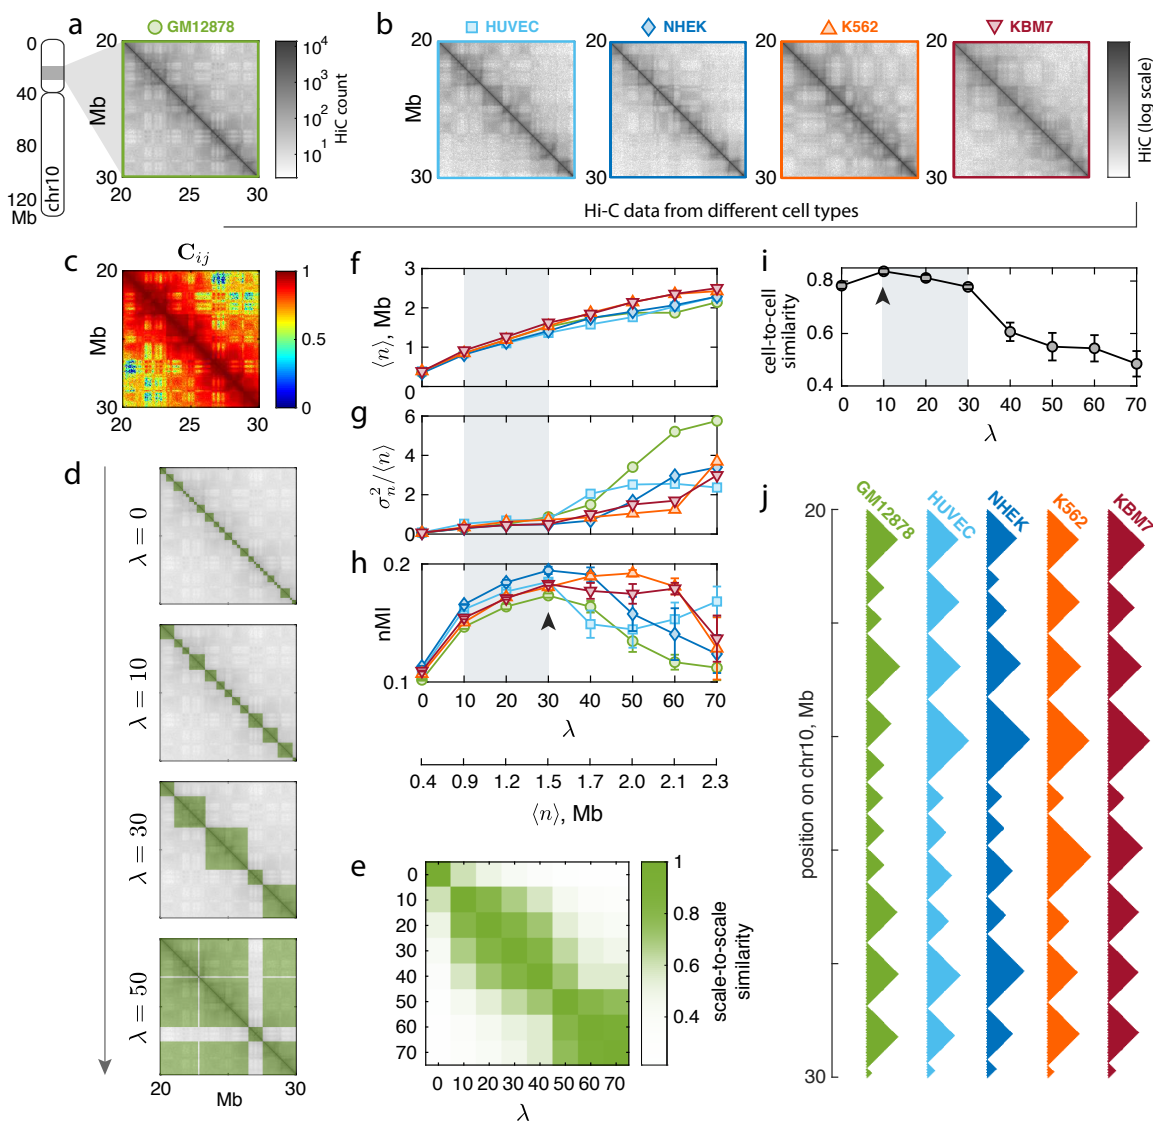

**Figure 2: Multi-scale domain solutions for various cell types, identified using Multi-CD.** (a) A subset of 50 kb resolution Hi-C data, covering a 10 Mb genomic region of chr10 in GM12878. (b) Similar subsets of Hi-C data from the same chromosome (chr10) in four other cell lines: HUVEC, NHEK, K562, and KBM7. (c-e) Applying Multi-CD to the Hi-C data in a, from GM12878. (c) The cross-correlation matrix  $C_{ij}$ . (d) Domain solutions determined by Multi-CD at 4 different values of  $\lambda = 0, 10, 20, 30$ . Multi-CD captures less fragmented domains with increasing  $\lambda$ . (e) Similarity between domain solutions at different  $\lambda$ 's, calculated in terms of Pearson correlation. The similarity matrix has its own modular structure, such that it is partitioned into two regions,  $\lambda > 40$  and  $\lambda < 40$ . The boundary value  $\lambda = 40$  corresponds to the average genomic size of  $\langle n \rangle = 1.8$  Mb. (f-h) Statistics of the domain solutions, found from all five Hi-C data in a-b. As  $\lambda$  is varied, we plot (f) the average domain size,  $\langle n \rangle$ ; (g) the index of dispersion in the domain size,  $D(= \sigma_n^2 / \langle n \rangle)$ ; (h) the normalized mutual information, nMI. (i-j) Comparison of domain solutions across cell types. (i) Average cell-to-cell similarity of domain solutions at fixed values of  $\lambda$ , in terms of Pearson correlations. (j) Domains obtained at  $\lambda = 10$ . See Fig. S2 for solutions at a smaller  $\lambda = 0$  and a larger  $\lambda = 40$ .

(iii) The goodness of CD solution quantified by the normalized mutual information (nMI, see Methods for its definition) against Hi-C data is maximized at  $\lambda^* = 30$  in all the cell types, except for K562 ( $\lambda^* = 50$ ) (Fig. 2h).

(iv) We also examined how much the identified domains are conserved across different cell lines, at fixed values of  $\lambda$ . The ex-

tent of domain conservation was quantified in terms of the average cell-to-cell similarity over all the cell-type pairs, where the similarity is evaluated using the Pearson correlation (see Methods). We found strong cell-to-cell domain conservation in the range of  $0 < \lambda \leq 30$ , which corresponds to the size of CD smaller than meta-TADs (Fig. 2i). The maximal extent of domain conservation

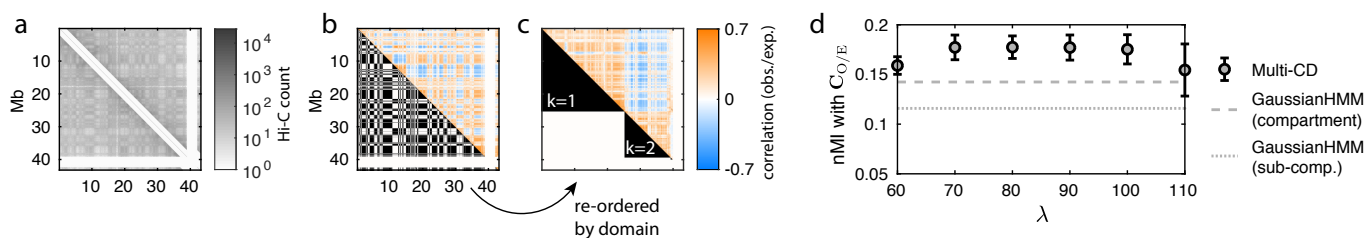

**Figure 3: Domain solutions for compartments.** (a) Input Hi-C data for compartment identification. The 2 Mb-diagonal band was removed. (b) Demonstrated are the domain solution at  $\lambda = 90$  obtained based on Hi-C data in (a) (lower triangle) and  $C_{O/E}$  (upper triangle). (c) The domain solution for compartments obtained using the original Hi-C data in (b) are re-ordered with the cluster (compartment) index. The two largest compartments ( $k = 1, 2$ ), corresponding to B ( $k = 1$ ) and A ( $k = 2$ ) compartments, are depicted in the lower triangle. Clearly separated B- and A-compartments emerge from the correlation matrix  $C_{O/E}$  (upper triangle) when the rows and columns of  $C_{O/E}$  are also re-ordered in accordance with the domain solution (lower triangle). (d) nMI between domain solutions at varying  $\lambda$  and  $C_{O/E}$ . The nMI of compartment structure with respect to  $C_{O/E}$  is maximized at  $\lambda = 70 - 100$ . The nMI values of sub-compartment (dashed line) and compartment (dotted line) from [17] are depicted for comparison.

across the cell lines is found at  $\lambda = 10$  (Fig. 2i, see also Fig. 2j), at which the average domain size is  $\langle n \rangle \approx 0.9$  Mb, which corresponds to the average size of TAD (see Fig. 2j obtained for  $\lambda = 10$  and compare it with Fig. S2 for  $\lambda = 0$  and  $\lambda = 40$ ) This finding is consistent with the widely accepted notion that TADs are the most well-conserved, common organizational and functional unit of chromosomes, across different cell types [21].

(v) Although we analyzed chromosome 10 as an example, the important features observed in the family of CD solutions are not specific to this particular chromosome (see Fig. S3).

## Two families of chromatin domains

Fig. 2h shows that there is a special value of  $\lambda^* \approx 30$  at which the CD solution best captures the pattern of Hi-C data. The family of CD solutions are also divided into two regimes at  $\lambda \approx \lambda^*$ .

**TAD-based chromatin organization at  $\lambda \leq \lambda^*$ .** What do the CDs at  $\lambda^* = 30$  represent? Our analysis in Fig. 2 points to two observations: the CDs at this scale have an average size of  $\langle n \rangle^* \approx 1.6$  Mb, which is slightly greater than the size of TADs ( $\langle n \rangle_{\text{TAD}} \approx 0.9$  Mb); the CD solutions at  $\lambda < \lambda^*$  show stronger similarity (Fig. 2e). Based on these observations, we surmise that CDs at  $\lambda^* \approx 30$  are associated with a higher-order structure of TADs, a “meta-TAD”, which results from an aggregate consisting of multiple TADs in genomic neighborhood [6]. In contrast to the previous analysis which extended the range of meta-TAD to entire chromosome via hierarchical clustering analysis [6], the meta-TAD implicated from Multi-CD is confined in a finite range, so that it is well discerned from compartments and at the same time is more correlated with TADs (Fig. 2e). Notably, the pattern of CDs identified at  $\lambda < \lambda^*$  is localized (see Fig. 2d,  $\lambda = 0, 10, 30$ ). Our algorithm identifies the diagonal blocks of Hi-C data as the subsets of a hierarchically crumpled structure of chromatin chain [40, 49].

**Compartment-like chromatin organization at  $\lambda > \lambda^*$ .** The super-Mb sized domains are generally defined as the compartment

in the chromosome organization [21]. In this case, a direct application of Multi-CD to the cross-correlation matrix  $C$  (as in Fig. 2) is dominated by the strong local correlation from the loci pairs in genomic neighborhood. A simple and effective solution to capture the compartment-like structures is to exclude a narrow band along the diagonal of the Hi-C matrix (Fig. 3a; also see Methods). Then we can apply Multi-CD to identify two large compartments with alternating patterns (Fig. 3b), which successfully capture the non-local correlations, as clearly seen with a re-ordering of indices (Fig. 3c). It is natural to associate a domain ( $k = 1$ ) showing a greater number of contacts (Fig. S4) with the compartment B, which is usually more compact than compartment A; and  $k = 2$  with compartment A. Further validation of the two compartments, by comparisons to epigenetic markers, will be presented below.

Conventionally, in order to identify chromosome compartments, the existing principal component analysis (PCA)-based methods use the Pearson correlation matrix of a low-resolution Hi-C data ( $C_{O/E}$ ) [16] (see Methods), whose heatmap is typically featured with checkerboard pattern (upper triangular part of Fig. 3b). Instead of making direct comparison with Hi-C data, we used this  $C_{O/E}$  matrix to evaluate the goodness of compartment-like CD solutions, again calculating the normalized mutual information (nMI). We note that Multi-CD outperforms GaussianHMM [17], a widely accepted benchmark, in capturing the large-scale structures in Hi-C (Fig. 3d).

## Hierarchical organization of chromatin domains

We examined the extent of hierarchical relationship between the four classes of CD solutions obtained at varying  $\lambda$ . From the diagram in which sub-TADs, TADs, meta-TADs and compartments are overlaid on top of each other (Fig. 4a), it is visually clear that sub-TADs or TADs almost never fail to be included inside the boundary of meta-TAD, whereas there are mismatches between the domain boundaries of meta-TADs and compartments. We evaluated

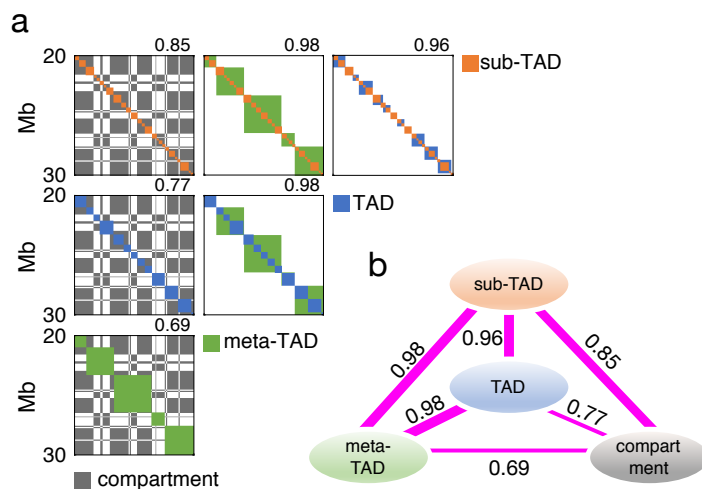

**Figure 4: Hierarchical organization of CD families (a)** Hierarchical structure of CDs are highlighted with the domain solutions for sub-TADs (red), TADs (green), meta-TADs (blue) and compartments (black). Each panel represents the superposition of two domain solution, and the hierarchy score  $h$  is provided above each panel. **(b)** A diagram of hierarchical relations between sub-TADs, TADs, meta-TADs and compartments based on the average hierarchy score calculated for chr10 of GM12878. Higher score for a pair of two different domains means that one domain is more nested to other domain.

the extent of overlap or domains-within-domains type of hierarchy between two domain solutions by means of the hierarchy scores ( $h$ ) which quantifies the extent of inclusion of smaller domains into larger domains (see [Methods](#)).

Based on the hierarchy scores, calculated over the CD solutions from Hi-C data of GM12878 ([Fig. 4b](#)), we found the basic principles for chromatin organization: (i) The hierarchy scores between the pairs of TAD-related domains (sub-TADs, TADs, and meta-TADs) are all  $> 0.96$ , which is appreciably greater than that of any pair of TAD-related domains with compartments. (ii) The hierarchical links of TADs and meta-TADs with compartments are relatively weak. This implies that TADs or meta-TADs are not necessarily the components of compartments, which is also consistent with recent reports that TADs and compartments are organized by different mechanisms [33, 50]. (iii) Although the hierarchy score between sub-TADs and compartments ( $h = 0.85$ ) is not so large as those among the pairs of TAD-based domains, it is still greater than the hierarchy scores between TADs and compartments ( $h = 0.77$ ) or between meta-TADs and compartments ( $h = 0.69$ ). Thus, sub-TAD can be considered a good candidate for a common building block of the chromatin architecture.

## Validation of domain solutions from Multi-CD

The CD solutions from Multi-CD are in good agreement with the previously proposed CDs, obtained from several different methods. Specifically, CDs correspond to the sub-TADs [17] in the prior-free solution at  $\lambda = 0$ , to the TADs [24, 51] at  $\lambda \approx 10$ , and to the compartments [17] at  $\lambda \approx 90$  (see [Fig. S5](#)). When assessed in terms of nMI of acquired CD solutions against the input Hi-C data, Multi-CD outperforms other methods in identifying three distinct CD families ([Fig. 5a](#)).

In order to further validate the biological relevance of the CD solutions from Multi-CD, we compared with several biomarkers that are known to be correlated with the spatial organization of the genome [52].

First, we calculated how much our domain boundaries obtained at  $\lambda = 10$  are correlated with the CTCF signals which are known to capture TAD boundaries [24, 26] ([Fig. 5b](#)). Compared to the correlation (or extent of overlap quantified by  $\chi(d)$ . See [Eq. 21](#) and [Fig. 5b](#)) of CD solutions for  $\lambda = 0$  with CTCF signals, the overlap at the domain boundary ( $d \approx 0$ ) is stronger for solutions at  $\lambda = 10$  and 20, which are in the parameter range where Multi-CD identifies TADs. We also observe that Multi-CD identifies TAD boundaries that are more sharply correlated with the CTCF binding sites than those identified by two popular methods, ArrowHead [17] and DomainCaller [24] ([Fig. 5b](#)). Specifically, when fitted to exponential function, the correlation lengths are 34 kb ( $\lambda = 0$ ), 143 kb ( $\lambda = 10$ ), and 234 kb ( $\lambda = 20$ ); whereas the correlation lengths obtained from ArrowHead and DomainCaller are  $\gtrsim 900$  kb ([Fig. 5b](#)).

Next, we compared our compartment-like domains with the replication timing profile (GM12878 Repli-Seq data) [7, 53]. The large-scale domains from Multi-CD (at  $\lambda = 90$ ) are in good agreement with the patterns of replication timing anticipated for the A/B compartments, which exhibits anti-correlated activation/repression along the replication cycle ([Fig. 5c-d](#)). Specifically, the replication signal in the Multi-CD-identified compartment A (blue shade in [Fig. 5c](#)) is active in the early phases (G1, S1, S2), whereas it is repressed (or deactivated) in the late phases (S3, S4, G2). An entirely opposite trend is observed for B-compartment (red shade in [Fig. 5c](#)): the replication activity in B compartment is repressed in the early phases (G1, S1, S2), and is activated in the late phases (S3, S4, G2). The Pearson correlation between the replication signals ([Fig. 5d](#)) confirms the clear contrast between the replication timing of A/B compartments quantitatively, and validates the domain solutions of compartments identified by Multi-CD.

## DISCUSSION

What fundamentally differentiates Multi-CD from other approaches rests on the algorithm by which the pattern of CD is identified. In the conventional methods, local features of Hi-C data, such as CD boundaries or loops enriched with higher contact frequencies,

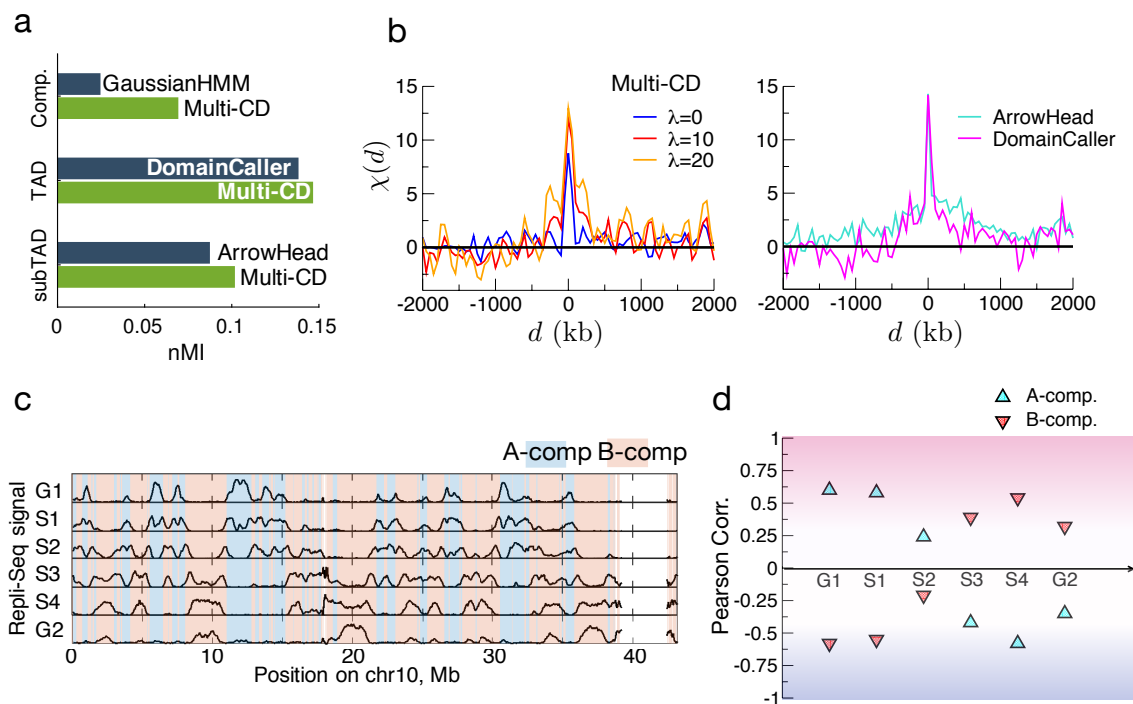

**Figure 5: Validation of CD solutions from Multi-CD.** (a) CD solutions (sub-TAD, TAD and compartment) assessed in terms of nMI against Hi-C data ( $\log_{10}$  M): Multi-CD outperforms ArrowHead, DomainCaller and GaussianHMM at the corresponding scale. (b) The overlap function  $\chi(d)$  calculated between CTCF enrichment and the domain boundaries obtained from different methods:  $\chi(d)$  for Multi-CD at  $\lambda = 0, 10,$  and  $20$  (left).  $\chi(d)$  for ArrowHead (middle) and DomainCaller (right). (c) Genome-wide, locus-dependent replication signal ( $t_{\text{rep}}$ , black lines). The genomic position of the two domains, B ( $k = 1$ ) and A ( $k = 2$ ) compartments obtained in Fig. 3, are shaded in light blue and light red. Here, we translated the acquired pattern of A/B compartments into a binary array  $\mathbf{q}$  by assigning two numbers, 1 for compartment B ( $k = 1$ , red), and  $-1$  for compartment A ( $k = 2$ , blue), along the genomic loci. (d) Pearson correlation ( $\equiv (t_{\text{rep}} \cdot \mathbf{q}) / |t_{\text{rep}}| |\mathbf{q}|$ ) between  $t_{\text{rep}}$  and the binarized array  $\mathbf{q}$  for compartment pattern defined in c. The replication activities of A- and B-compartments are anti-correlated. In the early phase of cell-cycle (G1, S1, S2) the replication of A-compartment is more active than B-compartment, but an opposite trend is observed in the later phase (S3, S4, G2).

are key for CD-identification and Hi-C data has to be formatted in accordance with the scale of domain to be identified. In contrast, Multi-CD solves the problem of global pattern clustering as its basic algorithm for CD discovery. Therefore, Multi-CD can be applied to any scale of interest without resorting to a coarse-grained version of Hi-C data or to a particular bin size.

The Multi-CD uses the tuning parameter  $\lambda$ , which is tantamount to the “chemical potential” in statistical thermodynamics, to set the average domain size, giving rise to  $\lambda$ -dependent CD solution for a given Hi-C data. nMI comparing CD solutions with the 50 kb resolution Hi-C data is maximized at  $\lambda \approx 30$ , which corresponds to  $\sim 1.5$  Mb in domain size (length) (Fig. 2f). Notably, 1.5 Mb, the average size of CD that we can best read off from the 50 kb resolution Hi-C data [17] used in this study, is also similar to the domain size detected by a recently proposed TAD detection algorithm called deDoC [54]. In essence, the concept of “graph structural entropy” used in deDoC is also based on global pattern recognition.

The authors of deDoC, who developed deDoC as a TAD detection algorithm, have concluded that their  $\sim 2$  Mb-sized domain solution from their analyses on 40 kb data of Dixon *et al.* [24] was the best solution for TAD, based on their finding that deDoC identified domain solution displayed the lowest structural entropy in comparison with all the five other TAD detection algorithms they tested. Interestingly, we also found that the best domain solution from varying  $\lambda$ , assessed in terms of nMI with Hi-C heatmap, was when  $\lambda \approx 30$ , which corresponds to the genomic length of 1.5 Mb; however, we do not conclude CD solution at  $\lambda = 30$  represents the solution for canonical TAD. Instead, we surmise the domain solution at  $\lambda = 30$  is for meta-TAD, an aggregate of TADs in genomic neighborhood. As indicated by the domain solutions from Multi-CD at varying  $\lambda$ , the extent of domain conservation across different cell types are maximized at  $\lambda = 10$  ( $\langle n \rangle = 0.8$  Mb). To be consistent with the general notion that TADs are the functional unit of chromosome well conserved across different cell types and species [24], CD so-

lution obtained at  $\lambda = 10$  is better interpreted as the solution for TAD.

We showed that the characteristics of CD solutions shared by the TAD-like domains do not precisely hold together in compartment-like domains. This finding is consistent with the recent insightful studies which report that compartments and TADs do not necessarily have a hierarchical relationship because they are formed by different mechanisms of motor-driven active loop extrusion and microphase separation [32–35]. Notably, even when clear mismatches are present between the meta-TAD and compartment, the sub-TADs are, in most of the cases, a part of the compartment (Fig. 4). This finding points to sub-TADs as the fundamental building blocks of the higher domain organization. In fact, the existence of sub-TADs is robust even when a higher resolution Hi-C data is analyzed. From a clustering analysis on 5 kb resolution Hi-C data, the boundaries of  $\sim 300$  kb-sized sub-TAD are clear and consistent with those obtained from 50 kb resolution Hi-C (see Fig. S6).

Finally, we explored the cell-type dependent chromatin organization and its link to gene expression. To this end, we inspected the details of CDs identified for TADs at  $\lambda = 10$  in the 10 Mb region of chr10 of five different cell types (GM12878, HUVEC, NHEK, K562, KBM7) (Fig. 2j). A comparison of RNA-seq profiles between different cells (Fig. 6) shows that the APBB1IP gene, which is regulated by other elements located in the region between 26.65 and 27.15 Mb, is transcriptionally active in GM12878 and KBM7 cells, but not in HUVEC, NHEK and K562 cells. It is interesting to find that around this gene, TAD boundaries in GM12878 and KBM7 cells also show appreciable difference from those in other three cell types. Whereas the gene and all of its regulatory elements are enclosed in a single TAD in GM12878 and KBM7, they are split into two domains in other three cell lines. It is expected that the integrity of TAD encompassing the genomic region of 26.5–27.5 Mb for GM12878 and KBM7 is critical for the expression of APBB1IP gene. This is consistent with the understanding that TADs are the functional boundaries for genetic interactions [5, 6, 18, 20].

In order to glean genome function from Hi-C data that vary with genomic state [10–13], a computationally efficient and accurate method to identify CD structures is of vital importance. In summary, we developed Multi-CD, a novel and versatile method for CD-identification. The method identifies multi-scale structures of chromatin domains by solving the global optimization problem. We find that the chromatin domains identified from Multi-CD are not only in excellent match with biological data such as CTCF binding sites and replication timing signal, but also outperform the existing methods. Quantitative analyses of CD structures identified by this unified algorithm across multiple genomic scales and various cell types not only offer general physical insight into how chromatin is organized in the nucleus but also will be of practical use to decipher broad spectrum of Hi-C data obtained under various conditions.

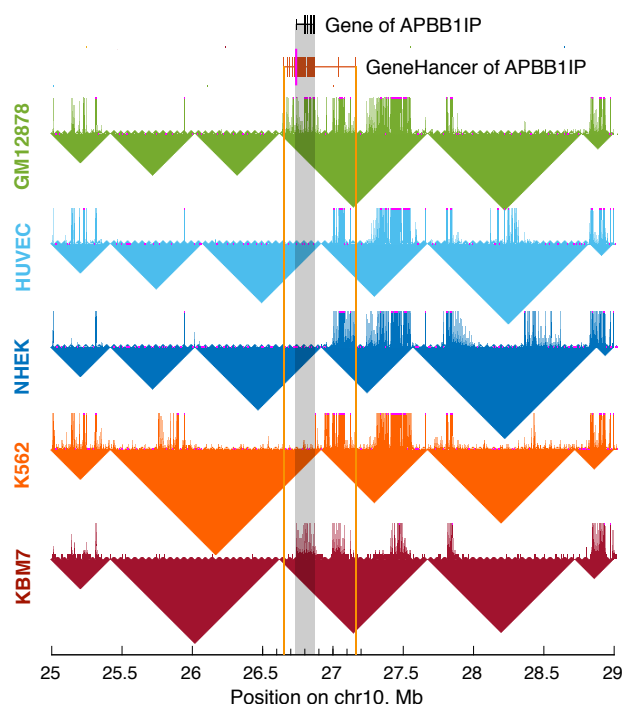

**Figure 6: Cell-line dependent TAD organization and its link to gene expression.** RNA-seq signals are depicted with lines above the TAD solutions for 5 different cell lines obtained from Multi-CD. The position of APBB1IP gene, which is only activated for GM12878 and KBM7, is marked at the top row. Drawn in second row is the geneHancer track for corresponding gene (APBB1IP) acquired from GeneHancer track in UCSC browser, which represent the regulatory elements, promoter (magenta line) and enhancers (orange lines), and their inferred target gene. It is of particular note that RNA-seq signals that show overlap with the geneHancer track of APBB1IP are only observed in GM12878 and KBM7.

## ONLINE CONTENT

Any methods, additional references are available in [Methods](#) and [Supplementary Information](#).

## References

- [1] Dekker, J., Rippe, K., Dekker, M., & Kleckner, N. Capturing chromosome conformation. *Science* **295**, 1306–1311 (2002).
- [2] Davies, J. O., Oudelaar, A. M., Higgs, D. R., & Hughes, J. R. How best to identify chromosomal interactions: a comparison of approaches. *Nat. Methods* **14**, 125 (2017).
- [3] Misteli, T. Beyond the sequence: cellular organization of genome function. *Cell* **128**, 787–800 (2007).
- [4] Bickmore, W. A & van Steensel, B. Genome architecture: domain organization of interphase chromosomes. *Cell* **152**, 1270–1284 (2013).
- [5] Lanctôt, C., Cheutin, T., Cremer, M., Cavalli, G., & Cremer, T. Dynamic genome architecture in the nuclear space: regulation of gene expression in three dimensions. *Nat. Rev. Genetics* **8**, 104 (2007).

- [6] Fraser, J., Ferrai, C., Chiariello, A. M., Schueler, M., Rito, T., et al. Hierarchical folding and reorganization of chromosomes are linked to transcriptional changes in cellular differentiation. *Mol. Sys. Biol.* **11**, 852 (2015).
- [7] Ryba, T., Hiratani, I., Lu, J., Itoh, M., Kulik, M., et al. Evolutionarily conserved replication timing profiles predict long-range chromatin interactions and distinguish closely related cell types. *Genome Res.* **20**, 761–770 (2010).
- [8] Hiratani, I., Ryba, T., Itoh, M., Yokochi, T., Schwaiger, M., et al. Global reorganization of replication domains during embryonic stem cell differentiation. *PLoS Biol.* **6**, e245 (2008).
- [9] Cavalli, G & Misteli, T. Functional implications of genome topology. *Nat. Struct. Mol. Biol.* **20**, 290–299 (2013).
- [10] Dixon, J. R., Jung, I., Selvaraj, S., Shen, Y., Antosiewicz-Bourget, J. E., et al. Chromatin architecture reorganization during stem cell differentiation. *Nature* **518**, 331 (2015).
- [11] Krijger, P. H. L & De Laat, W. Regulation of disease-associated gene expression in the 3D genome. *Nat. Rev. Mol. Cell Biol.* **17**, 771 (2016).
- [12] Dixon, J. R., Xu, J., Dileep, V., Zhan, Y., Song, F., et al. Integrative detection and analysis of structural variation in cancer genomes. *Nat. Genetics* **50**, 1388 (2018).
- [13] Shao, Y., Lu, N., Wu, Z., Cai, C., Wang, S., et al. Creating a functional single-chromosome yeast. *Nature* **560**, 331 (2018).
- [14] Jäger, R., Migliorini, G., Henrion, M., Kandaswamy, R., Speedy, H. E., et al. Capture Hi-C identifies the chromatin interactome of colorectal cancer risk loci. *Nature Commun* **6**, 6178 (2015).
- [15] Baca, S. C., Prandi, D., Lawrence, M. S., Mosquera, J. M., Romanel, A., et al. Punctuated evolution of prostate cancer genomes. *Cell* **153**, 666–677 (2013).
- [16] Lieberman-Aiden, E., Van Berkum, N. L., Williams, L., Imakaev, M., Ragoczy, T., et al. Comprehensive mapping of long-range interactions reveals folding principles of the human genome. *Science* **326**, 289–293 (2009).
- [17] Rao, S. S., Huntley, M. H., Durand, N. C., Stamenova, E. K., Bochkov, I. D., et al. A 3D Map of the Human Genome at Kilobase Resolution Reveals Principles of Chromatin Looping. *Cell* **159**, 1665 – 1680 (2014).
- [18] Cremer, T & Cremer, M. Chromosome territories. *Cold Spring Harbor Perspectives in Biology* **2** (2010).
- [19] Dekker, J & Heard, E. Structural and functional diversity of topologically associating domains. *FEBS Letters* **589**, 2877–2884 (2015).
- [20] Sexton, T & Cavalli, G. The role of chromosome domains in shaping the functional genome. *Cell* **160**, 1049 – 1059 (2015).
- [21] Dixon, J. R., Gorkin, D. U., & Ren, B. Chromatin domains: the unit of chromosome organization. *Mol. Cell* **62**, 668–680 (2016).
- [22] Wang, S., Su, J.-H., Believeau, B. J., Bintu, B., Moffitt, J. R., et al. Spatial organization of chromatin domains and compartments in single chromosomes. *Science* page aaf8084 (2016).
- [23] Rowley, M. J., Nichols, M. H., Lyu, X., Ando-Kuri, M., Rivera, I. S. M., et al. Evolutionarily conserved principles predict 3D chromatin organization. *Mol. Cell* **67**, 837–852 (2017).
- [24] Dixon, J. R., Selvaraj, S., Yue, F., Kim, A., Li, Y., et al. Topological domains in mammalian genomes identified by analysis of chromatin interactions. *Nature* **485**, 376–380 (2012).
- [25] Sexton, T., Yaffe, E., Kenigsberg, E., Bantignies, F., Leblanc, B., et al. Three-Dimensional Folding and Functional Organization Principles of the *Drosophila* Genome. *Cell* **148**, 458 – 472 (2012).
- [26] Nora, E. P., Lajoie, B. R., Schulz, E. G., Giorgetti, L., Okamoto, I., et al. Spatial partitioning of the regulatory landscape of the X-inactivation center. *Nature* **485**, 381 (2012).
- [27] Pope, B. D., Ryba, T., Dileep, V., Yue, F., Wu, W., et al. Topologically associating domains are stable units of replication-timing regulation. *Nature* **515**, 402 (2014).
- [28] Phillips-Cremins, J. E., Sauria, M. E., Sanyal, A., Gerasimova, T. I., Lajoie, B. R., et al. Architectural protein subclasses shape 3D organization of genomes during lineage commitment. *Cell* **153**, 1281–1295 (2013).
- [29] Jin, F., Li, Y., Dixon, J. R., Selvaraj, S., Ye, Z., et al. A high-resolution map of three-dimensional chromatin interactome in human cells. *Nature* **503**, 290 (2013).
- [30] Rocha, P. P., Raviram, R., Bonneau, R., & Skok, J. A. Breaking TADs: insights into hierarchical genome organization. *Epigenomics* **7**, 523–526 (2015).
- [31] Wang, Q., Sun, Q., Czajkowsky, D. M., & Shao, Z. Sub-kb Hi-C in *D. melanogaster* reveals conserved characteristics of TADs between insect and mammalian cells. *Nature communications* **9**, 188 (2018).
- [32] Fudenberg, G., Imakaev, M., Lu, C., Goloborodko, A., Abdennur, N., et al. Formation of chromosomal domains by loop extrusion. *Cell Reports* **15**, 2038–2049 (2016).
- [33] Schwarzer, W., Abdennur, N., Goloborodko, A., Pekowska, A., Fudenberg, G., et al. Two independent modes of chromatin organization revealed by cohesin removal. *Nature* **551**, 51 (2017).
- [34] Gassler, J., Brandão, H. B., Imakaev, M., Flyamer, I. M., Ladstätter, S., et al. A mechanism of cohesin-dependent loop extrusion organizes zygotic genome architecture. *EMBO J.* **36**, 3600–3618 (2017).
- [35] Nuebler, J., Fudenberg, G., Imakaev, M., Abdennur, N., & Mirny, L. A. Chromatin organization by an interplay of loop extrusion and compartmental segregation. *Proc. Natl. Acad. Sci. U. S. A.* **115**, E6697–E6706 (2018).
- [36] Weinreb, C & Raphael, B. J. Identification of hierarchical chromatin domains. *Bioinformatics* **32**, 1601–1609 (2016).
- [37] Shin, H., Shi, Y., Dai, C., Tjong, H., Gong, K., et al. Topdom: an efficient and deterministic method for identifying topological domains in genomes. *Nucleic Acids Res.* **44**, e70–e70 (2015).
- [38] Mateos-Langerak, J., Bohn, M., de Leeuw, W., Giromus, O., Manders, E. M., et al. Spatially confined folding of chromatin in the interphase nucleus. *Proc. Natl. Acad. Sci. U. S. A.* **106**, 3812–3817 (2009).
- [39] Barbieri, M., Chotalia, M., Fraser, J., Lavitas, L.-M., Dostie, J., et al. Complexity of chromatin folding is captured by the strings and binders switch model. *Proc. Natl. Acad. Sci. U. S. A.* **109**, 16173–16178 (2012).
- [40] Halverson, J. D., Smrek, J., Kremer, K., & Grosberg, A. Y. From a melt of rings to chromosome territories: the role of topological constraints in genome folding. *Rep. Prog. Phys.* **77**, 022601 (2014).
- [41] Brackley, C. A., Brown, J. M., Waithe, D., Babbs, C., Davies, J., et al. Predicting the three-dimensional folding of cis-regulatory regions in mammalian genomes using bioinformatic data and polymer models. *Genome Biol.* **17**, 59 (2016).
- [42] Shi, G., Liu, L., Hyeon, C., & Thirumalai, D. Interphase Human Chromosome Exhibits Out of Equilibrium Glassy Dynamics. *Nat. Commun.* **9**, 3161 (2018).
- [43] Liu, L., Shi, G., Thirumalai, D., & Hyeon, C. Chain organization of human interphase chromosome determines the spatiotemporal dynamics of chromatin loci. *PLoS Comp. Biol.* **14**, e1006617 (2018).
- [44] Bryngelson, J. D & Thirumalai, D. Internal constraints induce localization in an isolated polymer molecule. *Phys. Rev. Lett.* **76**, 542–545 (1996).
- [45] Bohn, M., Heermann, D. W., & van Driel, R. Random loop model for long polymers. *Phys. Rev. E.* **76**, 051805 (2007).
- [46] Laloux, L., Cizeau, P., Bouchaud, J.-P., & Potters, M. Noise dressing of financial correlation matrices. *Phys. Rev. Lett.* **83**, 1467 (1999).
- [47] Noh, J. D. Model for correlations in stock markets. *Phys. Rev. E.* **61**, 5981 (2000).
- [48] Giada, L & Marsili, M. Data clustering and noise undressing of correlation matrices. *Phys. Rev. E.* **63**, 061101 (2001).
- [49] Grosberg, A., Nechaev, S., & Shakhnovich, E. The role of topological constraints in the kinetics of collapse of macromolecules. *J. Phys.* **49**, 2095–2100



(1988).

- [50] Nora, E. P., Goloborodko, A., Valton, A.-L., Gibcus, J. H., Uebersohn, A., et al. Targeted degradation of CTCF decouples local insulation of chromosome domains from genomic compartmentalization. *Cell* **169**, 930–944 (2017).
- [51] Serra, F., Baù, D., Goodstadt, M., Castillo, D., Filion, G. J., et al. Automatic analysis and 3D-modelling of Hi-C data using TADbit reveals structural features of the fly chromatin colors. *PLoS Comp. Biol.* **13**, 1–17 (2017).
- [52] Misteli, T. Beyond the sequence: cellular organization of genome function. *Cell* **128**, 787–800 (2007).
- [53] Hansen, R. S., Thomas, S., Sandstrom, R., Canfield, T. K., Thurman, R. E., et al. Sequencing newly replicated DNA reveals widespread plasticity in human replication timing. *Proc. Natl. Acad. Sci. U. S. A.* **107**, 139–144 (2010).
- [54] Li, A., Yin, X., Xu, B., Wang, D., Han, J., et al. Decoding topologically associating domains with ultra-low resolution Hi-C data by graph structural entropy. *Nature Commun* **9**, 3265 (2018).

## ACKNOWLEDGEMENT

We thank the KIAS Center for Advanced Computation for providing computing resources. C.H. acknowledges the partial support from the National Research Foundation of Korea (NRF-2018R1A2B3001690).

## AUTHOR CONTRIBUTIONS

M.H.K., J.H.B., L.L., and C.H. conceived the project and designed the algorithm. M.H.K., J.H.B. implemented the algorithm. M.H.K., J.H.B., and L.L. analyzed all the results. M.H.K., J.H.B., and C.H. wrote the manuscript.

## COMPETING INTERESTS

The authors declare no competing interests.

## METHODS

### Data acquisition

**Hi-C data.** We applied Multi-CD on the 50 kb-resolution Hi-C data of chr10 from five different cell types (GM12878, HUVEC, NHEK, K562, and KBM7). The data were obtained through GEO data repository (GSE63525-cell type-primary) [17].

**Biological markers.** The domain solutions from Multi-CD were compared with known biological markers. We obtained these data mostly from the ENCODE project [55]. Specifically, we used the enrichment data of the transcriptional repressor CTCF measured in a Chip-Seq assay from <http://hgdownload.cse.ucsc.edu/goldenPath/hg19/encodeDCC/wgEncodeUwTfbs/wgEncodeUwTfbsGm12878CtcfStdPkRep1.narrowPeak.gz>. The Repli-seq signals in the six phases G1, S1, S2, S3, S4, and G2 were obtained from <http://hgdownload.cse.ucsc.edu/goldenPath/hg19/encodeDCC/wgEncodeUwRepliSeq/>, and were averaged over 50 kb windows along the genome to construct the replication timing profiles. The RNA-seq data for the four cell lines GM12878, HUVEC, NHEK and K562 were also obtained from <http://hgdownload.cse.ucsc.edu/goldenpath/hg19/encodeDCC/wgEncodeCaltechRnaSeq/>. RNA-seq for the cell line KBM7 were separately obtained from [https://opendata.cemmm.at/barlowlab/2015\\_Kornienko\\_et\\_al/hg19/AK\\_KBM7\\_2\\_WT\\_SN.F.bw](https://opendata.cemmm.at/barlowlab/2015_Kornienko_et_al/hg19/AK_KBM7_2_WT_SN.F.bw).

### Pre-processing of Hi-C data

**Normalization and contact probability.** We performed Knight-Ruiz (KR) normalization [56] on Hi-C data, which normalizes Hi-C data such that any row and column sums to the unity. As a result, most of the values of KR normalized Hi-C matrix elements ( $M_{ij}$ ) are on the order of  $\mathcal{O}(N^{-1})$ , which is far smaller than 1. In order to use the M-matrix as the contact probability matrix  $\mathbf{P}$ , defined element-wise as  $(\mathbf{P})_{ij} = p_{ij}$ , we first divided  $\mathbf{M}$  by the mean value of the greatest matrix elements typically concentrated near the diagonal band of M-matrix, i.e.,  $\mu = \frac{1}{N-1} \sum_{i=1}^{N-1} M_{i,i+1}$ , and next multiplied a constant value  $\mu_c$ . In other words, we rescaled  $M_{ij}$  into  $p_{ij} = (\mu_c/\mu)M_{ij}$ . We set  $\mu_c = 0.9$  and regarded the elements of  $\mathbf{P}$  greater than 1 as outliers and set them to 1, which effectively filters the unusually high contact signals from the actual data. For the contact probability for a pair of loci, we used  $p_{ij}$ , a rescaled and high-intensity-signal-filtered version of  $M_{ij}$ .

**Correlation matrix from Hi-C.** A chromosome can be regarded as a polymer chain containing  $N$  monomers, each of which ( $i$ -th monomer or locus) corresponds to the  $i$ -th genomic segment and its spatial position is written as  $\mathbf{r}_i$ . Employing the idea of the random loop model (RLM) [45], which has been proposed for modeling chromosome conformation, we interpret that chromosome conformation is described with an ideal polymer network crosslinked at multiple sites. In RLM, the position vector of the chromosome  $\mathbf{r} = (\mathbf{r}_1, \mathbf{r}_2, \dots, \mathbf{r}_N)$  obeys gaussian distribution with zero mean

$\langle \mathbf{r} \rangle = \mathbf{0}$  and covariance matrix  $\Sigma$ , the probability of relative distance  $P(r_{ij})$  between  $i$  and  $j$ -th monomers in 3D is given as

$$P(r_{ij}; \gamma_{ij}) = \frac{4}{\sqrt{\pi}} \gamma_{ij}^{3/2} r_{ij}^2 \exp(-\gamma_{ij} r_{ij}^2). \quad (1)$$

where  $\gamma_{ij} = 1/2(\sigma_{ii} + \sigma_{jj} - 2\sigma_{ij})$  and  $\sigma_{ij} \equiv (\Sigma)_{ij}$ . Provided that the contact between two monomers is formed when their distance  $r_{ij}$  is within a certain cutoff distance  $r_c$ , the contact probability ( $p_{ij}$ ) can be calculated as

$$p_{ij} = \int_0^{r_c} P(r_{ij}; \gamma_{ij}) dr_{ij} = \text{erf}(\gamma_{ij}^{1/2} r_c) - 2r_c \sqrt{\frac{\gamma_{ij}}{\pi}} e^{-\gamma_{ij} r_c^2}, \quad (2)$$

with  $\text{erf}(x) = \frac{2}{\sqrt{\pi}} \int_0^x dt e^{-t^2}$ . Note that  $p_{ij}$  is monotonically increasing function of  $\gamma_{ij} (\geq 0)$ . Therefore, given covariance matrix  $\Sigma$ , we can explicitly calculate the contact probability  $p_{ij}$  through Eq.(2). In inverse problem, the covariance matrix  $\Sigma$  can be inferred from contact probability matrix  $\mathbf{P}$ . However, this inverse problem requires additional assumption about the variance of each monomer  $\sigma_{ii}$  from the definition of  $\gamma_{ij} = 1/2(\sigma_{ii} + \sigma_{jj} - 2\sigma_{ij})$ . We assume that all variances have identical value ( $\sigma_{ii} = \sigma_{jj} = \sigma_c$ ), which generates the following normalized covariance matrix (i.e. correlation matrix,  $\mathbf{C}$ )

$$(\mathbf{C})_{ij} = \frac{\sigma_{ij}}{\sqrt{\sigma_{ii}\sigma_{jj}}} = 1 - \frac{1}{2\sigma_c \gamma_{ij}}. \quad (3)$$

The parameter  $\sigma_c$  sets the overall intensity of  $\mathbf{C}$ . Here, we set this variable as the median of  $1/2\gamma_{ij}$  to maintain the balance of  $\mathbf{C}_{ij}$ .

The primary goal of this study is to extract information of CDs from Hi-C correlation matrix ( $\mathbf{C}$ ). In fact, a very similar problem has been posed for stock market price fluctuations [46, 47]. Adapting the formalism in References [46, 47], we assumed that  $x_i$ , which stands for the ‘‘genomic state’’ (or ‘‘transcriptional state’’) of  $i$ -th locus, obeys the following stochastic equation in terms of the standardized variable  $\xi_i$ , i.e.,  $\xi_i = (x_i - \langle x_i \rangle) / \sigma_{x_i}$

$$\xi_i = y(\eta_{s_i}, \epsilon_i) = \sqrt{\frac{g_{s_i}}{1 + g_{s_i}}} \eta_{s_i} + \frac{1}{\sqrt{1 + g_{s_i}}} \epsilon_i \quad (4)$$

where  $s_i$  denotes the index of CD to which the  $i$ -th locus is clustered, and the parameter  $g_{s_i}$  ( $-1/2 \leq g_{s_i} \leq \infty$ ) defines the strength of intra-CD correlation;  $\eta_{s_i}$  and  $\epsilon_i$  are the independent and identically-distributed (i.i.d) random variables with zero mean and unit variance,  $\eta_{s_i}, \epsilon_i \sim \mathcal{N}(0, 1)$ . From Eq.4, the cross-correlation between the loci  $i$  and  $j$  is written as

$$\langle \xi_i \xi_j \rangle = \frac{g_{s_i}}{1 + g_{s_i}} \delta_{s_i s_j} + \frac{1}{1 + g_{s_i}} \delta_{ij}. \quad (5)$$

Therefore, in light of Eq.5, the first term of Eq.4 on the right hand side represents intra-CD variation of the  $s_i$ -th CD where intra-domain correlation increases with  $g_{s_i}$ ; the second term of Eq.4 corresponds to a noise that randomizes the intra-domain correlation dictated by the first term. By matching Eq.3 with Eq.5

$$(\mathbf{C})_{ij} := \langle \xi_i \xi_j \rangle. \quad (6)$$

one can use the cross-correlation matrix  $\mathbf{C}$  from  $\sigma_{ij}$  as an input for Multi-CD.

### Removal of the diagonal band for identifying compartments.

The Hi-C matrix shows that the interaction strength is highly concentrated near the diagonal elements, which makes it difficult to identify the compartment characterized with the long-range interaction pattern. To circumvent this issue, the previous methods have either intentionally reduced the resolution of Hi-C data (usually to 1Mb) [16] or used only inter-chromosomal interactions [17]. In this study, as a similar motivation we ignore the diagonal band of  $\mathbf{C}$ . Specifically, we set all elements in  $\mathbf{C}$  to zero if its genomic distance ( $|i - j|$ ) is smaller than  $l_c$ . We scanned  $l_c$  and found that the CD solutions most consistent with the compartment are obtained for  $l_c^* = 40$  ( $\simeq 2$  Mb in 50 kb resolution). This value is almost identical to the crossover value of domain size  $n^*$  which sets the boundary between TAD-like and compartment-like domains.

### The observed/expected (O/E) matrix and its Pearson correlation matrix.

The O/E matrix was used to account for the genomic distance-dependent contact number due to random polymer interactions in chromosome [16]. Each pair ( $i, j$ ) in O/E matrix is calculated by taking the count number  $M_{ij}$  (observed number) and dividing it by average contacts within the same genomic distance  $d = |i - j|$  (expected number). Since the expected number could be noisy, one smooths it by increasing the window size (see refs [16, 17] for further details). In this study, we used the expected number obtained from [17]. The Pearson correlation matrix of the O/E ( $\mathbf{C}_{O/E}$ ) represents the overall contact pattern through pairwise correlation coefficients between loci.

### Identifying chromatin domains

Our goal is to find the chromatin domain (CD) solution  $\mathbf{s} = \{s_1, s_2, \dots, s_N\}$ , as well as a set of parameters for the intra-CD correlation  $G = \{g_1, g_2, \dots, g_{K_{\max}}\}$ , that best represent the pattern in the Hi-C data. Each  $\mathbf{s}$  is a *state* in the CD solution space. For each genomic locus  $i \in \{1, 2, \dots, N\}$ , the element of the CD solution  $s_i = k$  indicates that the  $i$ -th locus belongs to the domain  $k$  ( $= 1, 2, \dots, K_{\max}$ ). It is always ensured that the elements of each  $\mathbf{s}$  spans a set of consecutive integers from 1 to  $K_{\max}$ , where  $K_{\max}$  is the number of distinct domains in the solution. For example, a state  $\mathbf{s} = \{1, 1, 1, 2, 2, 3\}$  describes a structure where the 6 loci are clustered into 3 domains as  $\{\{s_1, s_2, s_3\}, \{s_4, s_5\}, \{s_6\}\}$  with the corresponding strength of three intra-domain correlation  $G = \{g_1, g_2, g_3\}$ .

**Likelihood: goodness of clustering.** To formulate the clustering problem, we first consider the likelihood of data, at a given CD

solution  $\mathbf{s}$  with strength parameters  $G$ : [48]

$$p(\text{data}|\mathbf{s}, G) = \left\langle \prod_{i=1}^N \delta \left( \xi_i - \sqrt{\frac{g_{s_i}}{1+g_{s_i}}} \eta_{s_i} - \frac{1}{\sqrt{1+g_{s_i}}} \epsilon_i \right) \right\rangle_{\eta, \epsilon} \quad (7)$$

where  $\langle \dots \rangle_{\eta, \epsilon}$  denotes an average over the gaussian noises for  $\eta_{s_i}$  and  $\epsilon_i$ . The data dependence of the likelihood is written simply in terms of the correlation matrix  $\mathbf{C}$  (Eq. 6). With standard calculations involving Gaussian integrals, the corresponding log-likelihood can be written as:

$$\log p(\mathbf{C}|\mathbf{s}, G) = -\frac{1}{2} \sum_{k=1}^{K_{\max}} \left[ (1+g_k) \left( n_k - \frac{g_k c_k}{1+g_k n_k} \right) - n_k \log(1+g_k) + \log(1+g_k n_k) \right],$$

where  $n_k = \sum_{i=1}^N \delta_{s_i, k}$  is the size of domain  $k$ , and  $c_k = \sum_{i,j=1}^N \mathbf{C}_{ij} \delta_{s_i, k} \delta_{s_j, k}$  is the sum of all intra-domain correlation elements. Conveniently, the likelihood  $p(\mathbf{C}|\mathbf{s}, G)$  is maximized at  $g_k = (c_k - n_k)/(n_k^2 - c_k)$  for a given  $\{\mathbf{s}, \mathbf{C}\}$ . We define the cost function  $\mathcal{E}(\mathbf{s}|\mathbf{C})$  as the negative log-likelihood at this likelihood-maximizing  $G$ :

$$\mathcal{E}(\mathbf{s}|\mathbf{C}) = \frac{1}{2} \sum_{k=1}^{K_{\max}} \left[ \log \frac{c_k}{n_k} + (n_k - 1) \log \frac{n_k^2 - c_k}{n_k^2 - n_k} \right], \quad (8)$$

such that  $\max_G p(\mathbf{C}|\mathbf{s}, G) = \exp(-\mathcal{E}(\mathbf{s}|\mathbf{C}))$ . The cost function evaluates the (negative) goodness of clustering for a given CD solution  $\mathbf{s}$ .

**Prior: preference to simpler solutions.** Because of the structural hierarchy inherent to chromosome and the ensemble characteristic of the Hi-C measurement, it is still an issue to define CDs at a certain length scale of interest. In order to construct a unified formalism that can control the overall domain size in a CD solution, we introduce a prior of the form  $p(\mathbf{s}) = \exp(-\lambda \mathcal{K}(\mathbf{s}))$ , where  $\mathcal{K}(\mathbf{s})$  increases with the complexity of the solution  $\mathbf{s}$ . Specifically, we define  $\mathcal{K}(\mathbf{s})$  as

$$\mathcal{K}(\mathbf{s}) = \exp \left( - \sum_{k=1}^{K_{\max}} \frac{n_k}{N} \log \frac{n_k}{N} \right), \quad (9)$$

such that it measures the effective number of CDs from the domain size distribution. For example, in the limit where all CDs are of the same size,  $\mathcal{K}(\mathbf{s}) = K_{\max}$ . This formulation is also equivalent to adding a regularizer to the cost function  $\mathcal{E}$ , such that the total cost function  $\mathcal{H}$  becomes:

$$\mathcal{H}(\mathbf{s}|\mathbf{C}) = \mathcal{E}(\mathbf{s}|\mathbf{C}) + \lambda \mathcal{K}(\mathbf{s}), \quad (10)$$

where the parameter  $\lambda$  controls the relative weight of  $\mathcal{K}(\mathbf{s})$  with respect to  $\mathcal{E}(\mathbf{s}|\mathbf{C})$ .

**Posterior distribution.** Then the posterior distribution is given by the following Bayes rule:

$$p(\mathbf{s}|\mathbf{C}) \propto p(\mathbf{C}|\mathbf{s}) p(\mathbf{s}) = \exp(-\mathcal{H}(\mathbf{s}|\mathbf{C})). \quad (11)$$

We remark that this formulation is analogous to the grand canonical ensemble in statistical mechanics. The total cost function  $\mathcal{H}(\mathbf{s}|\mathbf{C})$  can be thought of as the effective Hamiltonian of the system;  $\mathcal{E}(\mathbf{s}|\mathbf{C})$  amounts to the energy of the system, and  $\mathcal{K}(\mathbf{s})$  the effective number of particles (in this case CDs) with a chemical potential of  $\lambda$ . It is natural to introduce an effective temperature  $T$ , so that the probability of having a state  $\mathbf{s}$  is given as

$$p(\mathbf{s}|\mathbf{C}) \propto \exp \left[ -\frac{1}{T} (\mathcal{E}(\mathbf{s}|\mathbf{C}) + \lambda \mathcal{K}(\mathbf{s})) \right]. \quad (12)$$

A higher temperature  $T$  makes the distribution flatter; in other words, it *tempers* the distribution. This is useful for an efficient posterior inference through simulated annealing.

**Metropolis-Hastings sampling.** We use Markov chain Monte Carlo (MCMC) sampling to find the maximum value of the posterior distribution, or equivalently the minimum value of the total cost function  $\mathcal{H}$ . The standard Metropolis-Hastings (MH) routine was used, such that at each trial move from the current state  $\mathbf{s}$  to the next state  $\mathbf{s}'$ , the move is accepted with a probability  $\min(1, \alpha)$ , where  $\alpha(\mathbf{s}, \mathbf{s}') = \exp[-(\mathcal{H}(\mathbf{s}'|\mathbf{C}) - \mathcal{H}(\mathbf{s}|\mathbf{C}))/T]$ . We used “single mutation” proposals, as described below.

To ensure that a steady state is reached, we continue the sampling until each chain collects  $t_{\text{tot}} \geq 5\tau^*$  samples in the CD solution space. Here  $\tau^*$  is the “relaxation time” defined as the number of steps it takes until the autocorrelation function  $R(\tau)$ , drops significantly:  $\tau^* = \text{argmin}_{\tau} |R(\tau) - 1/e|$ . The autocorrelation function is calculated from the value of the total cost function  $\mathcal{H}$ , as

$$R(\tau) = \frac{1}{\sigma^2} \langle (\mathcal{H}(\mathbf{s}_t|\mathbf{C}) - \mu)(\mathcal{H}(\mathbf{s}_{t+\tau}|\mathbf{C}) - \mu) \rangle_t, \quad (13)$$

where  $\mathbf{s}_t$  is the  $t$ -th sample in the chain, and  $\mu$  and  $\sigma$  are the mean and standard deviation of  $\{\mathcal{H}(\mathbf{s}_t|\mathbf{C})\}$ , respectively. The running time average in Eq. 13,  $\langle \dots \rangle_t \left[ = \frac{1}{t_{\text{tot}} - \tau} \int_0^{t_{\text{tot}} - \tau} dt (\dots) \right]$ , is taken over all the pairs of samples with the time gap of  $\tau$ . We stop the sampling as soon as the total sampling time is five times longer than the relaxation time ( $t_{\text{tot}} > 5 \cdot \tau^*(t_{\text{tot}})$ ), so that the state  $\mathbf{s}_t$  (or  $\mathcal{H}(\mathbf{s}_t|\mathbf{C})$ ) is practically in steady states.

**Single mutation in the CD solution space.** In the space of CD solutions, we define a single mutation as a move from a state  $\mathbf{s}$  to another state  $\mathbf{s}'$ , such that the two CD solutions  $(\mathbf{s}, \mathbf{s}')$  differ only by one genomic locus. In other words, it is a move with distance  $d(\mathbf{s}, \mathbf{s}') = 1$ , where the distance between the two CD states is defined as the number of loci with differing domain memberships,  $d(\mathbf{s}, \mathbf{s}') = \sum_{i=1}^N \text{XOR}(s_i, s'_i)$ . More precisely, because a CD solution is invariant upon permutations of the domain indices,  $d$  is uniquely defined as the *minimal* number of mismatches over all possible domain index permutations. We define the set of all single-mutated neighbors around a state  $\mathbf{s}$  as  $S_1(\mathbf{s}) = \{\mathbf{s}' : d(\mathbf{s}, \mathbf{s}') = 1\}$ .

**Simulated annealing.** We use the simulated annealing to explore the high-dimensional CD solution space which is also likely characterized with multiple local minima. We start from a finite temperature  $T = T_0 > 0$  and slowly decrease it to  $T \rightarrow 0$ , letting the system relax toward the global minimum of the configurational landscape of  $\mathcal{H}$  (Fig. S7). The simulated annealing process is described below.

*Initialization.* An initial configuration  $\mathbf{s}^{(0)}$  is generated in two random steps. First, the total number of CDs,  $K_{\max}$ , is drawn randomly from the set of integers  $\{1, \dots, N\}$ . Then, each genomic locus  $i \in \{1, \dots, N\}$  is allocated randomly into one of the CDs,  $k \in \{1, 2, \dots, K_{\max}\}$ . The initial temperature  $T_0$  is determined such that the acceptance probability for the “worst” move around  $\mathbf{s}^{(0)}$  is 0.5. Specifically, it is given as  $T_0 = \operatorname{argmin}_T |\exp(-\Delta\mathcal{H}_1/T) - 0.5|$ , where  $\Delta\mathcal{H}_1 = \max_{\mathbf{s} \in S_1(\mathbf{s}_0)} \{\mathcal{H}(\mathbf{s}|\mathbf{C}) - \mathcal{H}(\mathbf{s}^{(0)}|\mathbf{C})\}$  is the energy difference to the least favorable move among the set of all single mutations.

*Iteration.* At each step  $r$ , the temperature is fixed at  $T_r$ . We sample the target distribution  $p_r(\mathbf{s}|\mathbf{C}) \propto \exp(-\mathcal{H}(\mathbf{s}|\mathbf{C})/T_r)$ , using the Metropolis-Hastings sampler described above. For the next step  $r + 1$ , the temperature is lowered by a constant cooling factor  $c_{\text{cool}} \in (0, 1)$ , such that the next temperature is  $T_{r+1} = c_{\text{cool}} \cdot T_r$ . We used  $c_{\text{cool}} = 0.95$  in this study.

*Final solution.* The annealing process is repeated until the temperature reaches a small (but finite) value  $T_f$ . We used  $T_f = 0.03$ . Then we quench the system to the closest local minimum by performing a “zero-temperature” sampling, in which a proposed move is always accepted if it lowers the cost function. This process is simply to remove any remaining fluctuation from the finite temperature, which is usually very small at this point. Because there is still no guarantee that the global minimum is found, we tried a batch of at least 10 different initial configurations and chose the final state  $\mathbf{s}^*$  that gives the minimal  $\mathcal{H}(\mathbf{s}^*|\mathbf{C})$ .

**Analysis on subsets of Hi-C data.** Our method allows the user to break down the Hi-C data into subsets, as long as the CDs are localized within the subsets (Fig. S8). This saves the algorithm from the large memory requirement of dealing with the entire intrachromosomal Hi-C (for example, Hi-C of chromosome 10 has 2711 bins in 50 kb resolution). For the analysis of the 50 kb resolution Hi-C data in this paper, we used subsets of the data that correspond to 40-Mb ranges along the genome, or 800 bins.

**The overall schematic involving the algorithm of Multi-CD.** A schematic diagram of Multi-CD is provided in Fig. S9.

### Analysis and evaluation of domain solutions

**Index of dispersion.** The index of dispersion for the domain size distribution is defined as  $D = \sigma_n^2 / \langle n \rangle$ , where  $\langle n \rangle$  is the average size of a domain, and  $\sigma_n^2$  is the variance. It measures how clustered or dispersed a given distribution is, compared to a normal distribution. If  $D < 1$ , it indicates that the domain sizes are all very similar. If

$D > 1$ , on the other hand, it means that the domain size distribution is over-dispersed and heterogeneous, which may be the case when there are a few large domains and many small ones.

**Similarity of two distinct CD solutions using Pearson correlation.** In order to measure the extent of similarity between two CD solutions  $\mathbf{s}$  and  $\mathbf{s}'$ , we consider the Pearson correlation at the level of loci pairs. We start by constructing the binary matrices  $\mathbf{B}$  and  $\mathbf{B}'$  that represent the two CD solutions, where  $(\mathbf{B})_{ij} = B_{ij} = \delta_{s_i, s_j}$ , such that the matrix element are all 1's within the same CD and 0 otherwise. Considering the lower triangular elements of  $\mathbf{B}$ , we can calculate the mean  $\bar{b} = \frac{2}{N(N-1)} \sum_{i < j} B_{ij}$  and the variance  $\sigma_B^2 = \frac{2}{N(N-1)} \sum_{i < j} (B_{ij} - \bar{b})^2$ ; similarly,  $\bar{b}'$  and  $\sigma_{B'}^2$ , for  $\mathbf{B}'$ . The similarity between  $\mathbf{B}$  and  $\mathbf{B}'$  is quantified with the Pearson correlation

$$\rho = \frac{\operatorname{cov}(B, B')}{\sigma_B \sigma_{B'}}, \quad (14)$$

where the element-wise covariance is  $\operatorname{cov}(B, B') = \frac{2}{N(N-1)} \sum_{i < j} (B_{ij} - \bar{b})(B'_{ij} - \bar{b}')$ .

**Normalized mutual information.** We use the mutual information to evaluate how well a CD solution  $\mathbf{s}$  captures the visible patterns in the pairwise correlation data. We consider the binary grouping matrix  $(\mathbf{B})_{ij} = B_{ij} = \delta_{s_i, s_j}$  for the CD solution of interest, and compare it to the input data matrix  $(\mathbf{A})_{ij} = A_{ij}$ . In this study, either  $\log_{10} \mathbf{M}$  or  $\mathbf{C}_{OE}$  was used in the place of  $\mathbf{A}$ . Assuming that we can treat the matrix elements  $a \in \mathbf{A}$  and  $b \in \mathbf{B}$  as two random variables, we can construct the joint distribution  $p(a, b)$  by binning and counting, as:

$$p(a, b) = \frac{2}{N(N-1)} \sum_{i < j} \delta_{A_{ij}, a} \delta_{B_{ij}, b}, \quad (15)$$

where the Kronecker delta for the continuous variable  $a$  should be understood in a discretized fashion. That is,  $\delta_{A_{ij}, a} = 1$  if  $A_{ij} \in [a, a + \Delta a)$  and 0 otherwise, where we used  $\Delta a = [\max\{A_{ij}\} - \min\{A_{ij}\}] / 100$  to discretize the values into 100 bins. It is straightforward to obtain the marginal distributions as  $p(a) = \sum_b p(a, b)$  and  $p(b) = \sum_a p(a, b)$ . We can use the standard definitions to calculate the marginal entropies,  $H(a) = -\sum_a p(a) \log(p(a))$  and  $H(b) = -\sum_b p(b) \log(p(b))$ , as well as the mutual information

$$I(a; b) = \sum_a \sum_b p(a, b) \log \left[ \frac{p(a, b)}{p(a)p(b)} \right]. \quad (16)$$

Note that the sum runs over the discretized values of  $a$  that are the endpoints of the bins used for counting, and over  $\{0, 1\}$  for the binary variable  $b$ . Finally, the normalized mutual information (nMI) is defined as

$$\text{nMI}(a; b) = \frac{I(a; b)}{\sqrt{H(a)H(b)}}. \quad (17)$$

**Hierarchy score.** We define the hierarchy score to quantify the hierarchical relationship between two CD solutions,  $\mathbf{s}$  and  $\mathbf{s}'$ . We assume that we know the average domain sizes for the two solutions: we will say that  $\mathbf{s}$  is a set of smaller CDs and  $\mathbf{s}'$  a set of larger CDs. Then the perfect hierarchy condition can be defined as in the following statement: if two loci  $i, j$  belong to the same CD in the smaller-scale  $\mathbf{s}$  ( $s_i = s_j$ ), then they also belong to the same CD in the larger-scale  $\mathbf{s}'$  ( $s'_i = s'_j$ ). Here we extend this idea to evaluate the extent of overlap of  $\mathbf{s}$  to  $\mathbf{s}'$ . To begin, for each domain  $k \in \mathbf{s}$  in the smaller-scale CD solution, the best overlap of this domain on  $\mathbf{s}'$  is quantified by the single-domain hierarchy score  $h_1$ :

$$h_1(k \rightarrow \mathbf{s}') = \max_{k' \in \mathbf{s}'} \left[ \frac{\sum_i \delta_{s_i, k} \delta_{s'_i, k'}}{\sum_i \delta_{s_i, k}} \right] \quad (18)$$

We get a maximum score  $h_1(k \rightarrow \mathbf{s}') = 1$  if there is a  $k' \in \mathbf{s}'$  such that the smaller domain  $k \in \mathbf{s}$  is completely included in the larger domain  $k' \in \mathbf{s}'$ . On the other hand, the worst score is obtained when the domains in the two CD solutions  $\mathbf{s}$  and  $\mathbf{s}'$  are completely uncorrelated, in which case  $h_1$  only reflects the overlap “by chance”. The chance level is written as  $\bar{h}_1(\mathbf{s}') = \langle n \rangle_{\mathbf{s}'} / N$ , where  $\langle n \rangle_{\mathbf{s}'} = \langle \sum_i \delta_{s'_i, k'} \rangle_{k' \in \mathbf{s}'}$  is the average domain size of the larger solution  $\mathbf{s}'$ . This naturally defines a normalized score

$$\hat{h}_1(k \rightarrow \mathbf{s}') = \frac{h_1(k \rightarrow \mathbf{s}') - \bar{h}_1(\mathbf{s}')}{1 - \bar{h}_1(\mathbf{s}')}. \quad (19)$$

Consequently, the hierarchy score  $h(\mathbf{s} \rightarrow \mathbf{s}')$  of the entire CD solution  $\mathbf{s}$  on  $\mathbf{s}'$  is calculated as a weighted sum of  $h_1$  as

$$h(\mathbf{s} \rightarrow \mathbf{s}') = \sum_{k \in \mathbf{s}} \hat{h}_1(k \rightarrow \mathbf{s}') \frac{n_k}{N}, \quad (20)$$

where  $n_k = \sum_i \delta_{s_i, k}$  is the size of domain  $k$  in  $\mathbf{s}$ . In this study, we are interested in  $h(\mathbf{s}^{\lambda_1} \rightarrow \mathbf{s}^{\lambda_2})$  for CD solutions evaluated at two distinct values  $\lambda_1 < \lambda_2$ , knowing that the average domain sizes are  $\langle n \rangle_{\mathbf{s}^{\lambda_1}} < \langle n \rangle_{\mathbf{s}^{\lambda_2}}$ .

### Correlation between CTCF signal and domain boundaries.

The validity of domain boundaries, determined from various CD-identification methods including Multi-CD, is assessed in terms of their correlation with the CTCF signal. We write  $\phi_{\text{CTCF}}(i)$  to indicate the CTCF signal at locus  $i$ . We also define a binary variable  $\psi_{\text{DB}}(i)$  that indicates the boundaries of a CD solution  $\mathbf{s}$ , such that  $\psi_{\text{DB}}(i)$  is 1 if the  $i$ -th locus is precisely in the domain boundary,  $\psi_{\text{DB}}(i) = 0$ , otherwise ( $\psi_{\text{DB}}(i) = (1 - \delta_{s_i, s_{i-1}} \delta_{s_i, s_{i+1}})$ ). We evaluated a distance-dependent, normalized overlap function  $\chi(d)$ , defined as

$$\begin{aligned} \chi(d) &= \frac{\langle \delta \phi_{\text{CTCF}}(i+d) \psi_{\text{DB}}(i) \rangle_i}{\langle \psi_{\text{DB}} \rangle} \\ &\approx \frac{\sum_{i=1}^{N-d} \phi_{\text{CTCF}}(i+d) \psi_{\text{DB}}(i)}{\sum_{i=1}^N \psi_{\text{DB}}(i)} - \frac{1}{N} \sum_{i=1}^N \phi_{\text{CTCF}}(i), \quad (21) \end{aligned}$$

where  $\delta \phi_{\text{CTCF}} = \phi_{\text{CTCF}} - \langle \phi_{\text{CTCF}} \rangle$  and the approximation sign is used because of  $\frac{N}{N-d} \approx 1$  for  $N \gg d$ . If the domain boundaries determined from a CD-identification method is correlated with TAD-capturing CTCF signal, a sharply peaked and large amplitude overlap function ( $\chi(d)$ ) is expected at  $d = 0$ .

### Code availability

The Matlab software package and associated documentation are available online (<https://github.com/multi-cd>).

### References for Methods

- [55] Consortium, E. P et al. An integrated encyclopedia of DNA elements in the human genome. *Nature* **489**, 57 (2012).
- [56] Knight, P. A & Ruiz, D. A fast algorithm for matrix balancing. *IMA J. Numer. Anal.* **33**, 1029–1047 (2013).

## SUPPLEMENTARY INFORMATION

**Fig S1.** Similarity between domain solutions at different  $\lambda$  in terms of Pearson correlation. The calculation was performed for chromosome 10 from five different cell lines

**Fig S2.** The structures of CDs obtained from Multi-CD for the five different cell lines (GM12878, HUVEC, NHEK, K562, KBM7).

**Fig S3.** Chromatin domain solutions of chromosome 11.

**Fig S4.** Genomic distance-dependent contact number for domain solutions of  $k = 1$  and  $k = 2$ .

**Fig S5.** Validation of domain solutions from Multi-CD by comparing to previous methods.

**Fig S6.** Identification of sub-TAD boundaries at 5 kb resolution.

**Fig S7.** Finding CD solutions through simulated annealing.

**Fig S8.** Robustness of clustering solutions over different subsets of Hi-C data.

**Fig S9.** Schematic of the Multi-CD algorithm.

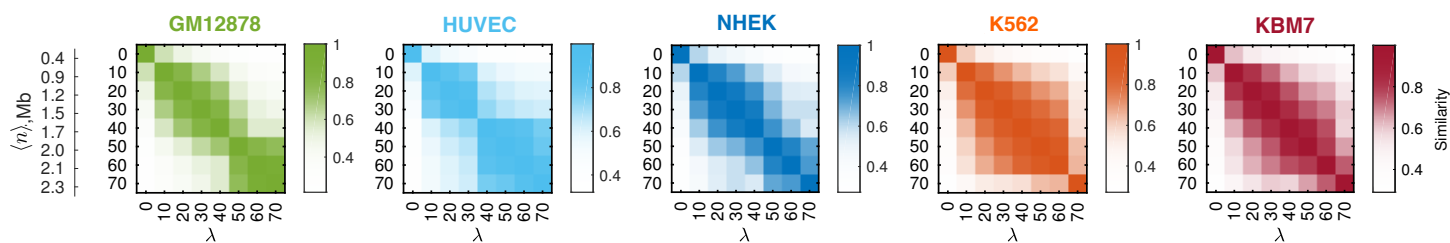

**Figure S1:** Similarity between domain solutions at different  $\lambda$  in terms of Pearson correlation. The calculation was performed for chromosome 10 from five different cell lines

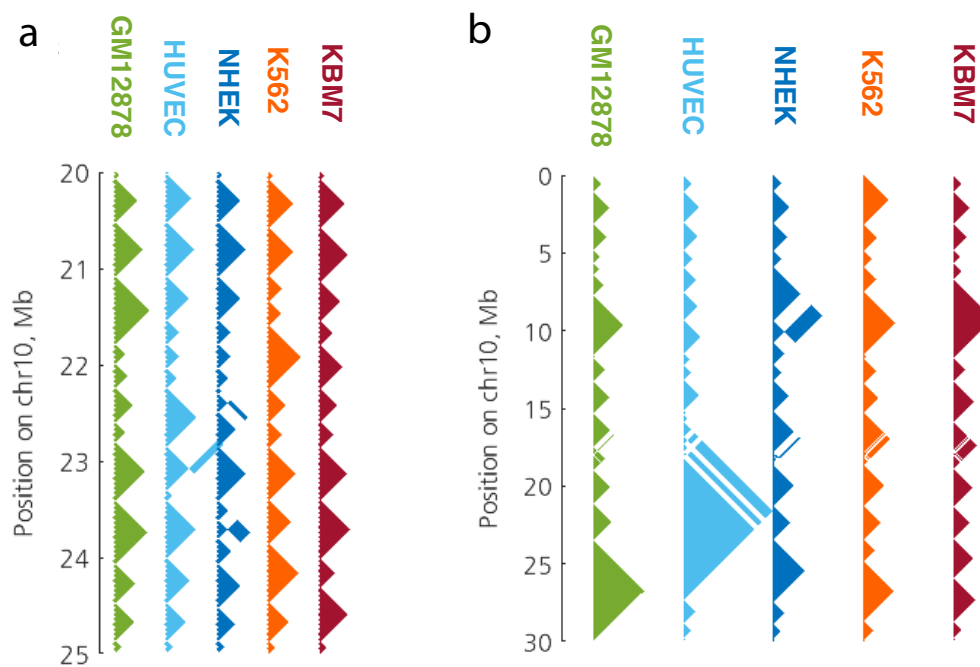

**Figure S2:** The structures of CDs obtained from Multi-CD for the five different cell lines (GM12878, HUVEC, NHEK, K562, KBM7) at (a)  $\lambda = 0$  and (b)  $\lambda = 40$

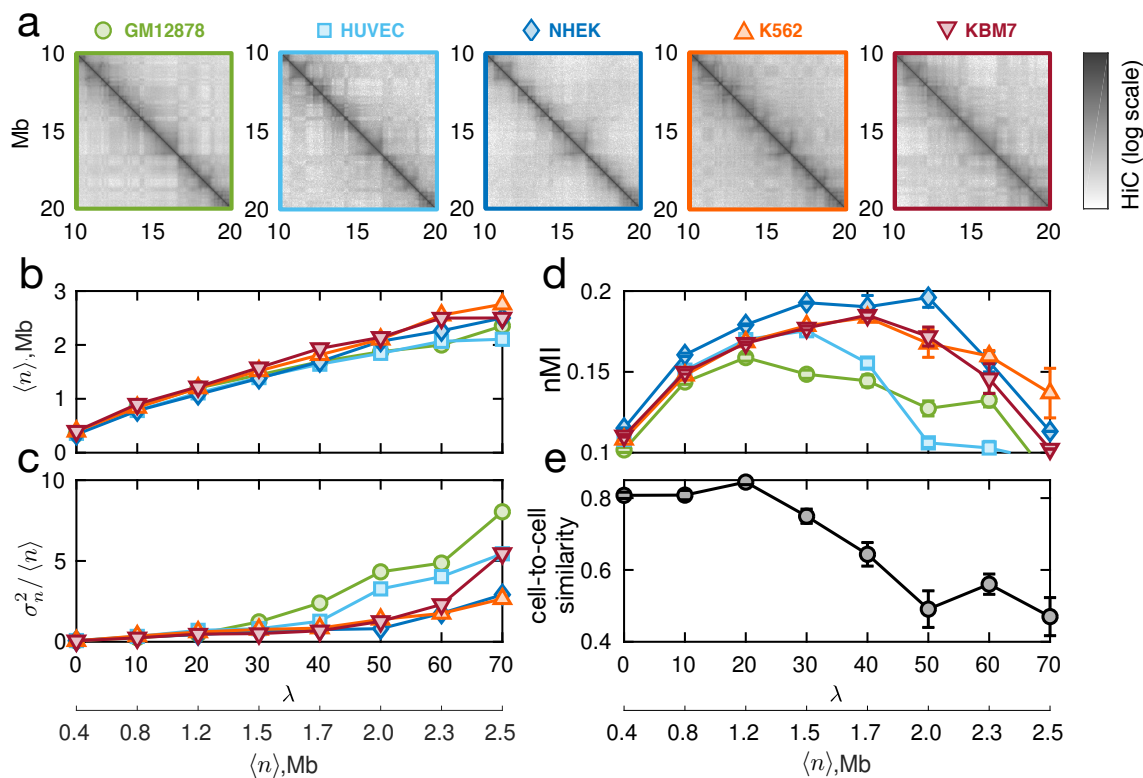

**Figure S3: Chromatin domain solutions for chromosome 11.** (a) Hi-C data of chromosome 11 from five different cell lines, GM12878, HUVEC, NHEK, K562, and KBM7. (b) Mean domain size  $\langle n \rangle$  as a function of  $\lambda$ . (c) The index of dispersion ( $D$ ) of domain size for varying  $\lambda$ . (d) The goodness of each domain solution assessed in terms of nMI with respect to Hi-C data ( $\log_{10} M$ ) (e) The similarity of domain solutions measured by the Pearson correlation between two binarized contact matrices across five cell types with different  $\lambda$ .

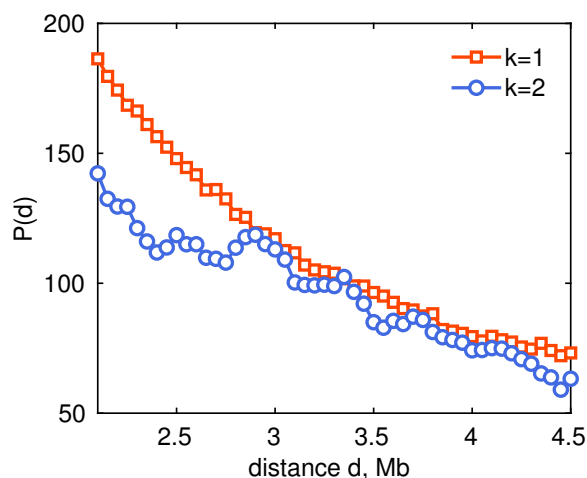

**Figure S4: Genomic distance-dependent contact number for domain solutions of  $k = 1$  and  $k = 2$ .** At short genomic distance, the domain solution of  $k = 1$  is characterized with a greater number of contacts than  $k = 2$ , which suggests that  $k = 1$  domain is locally more compact.



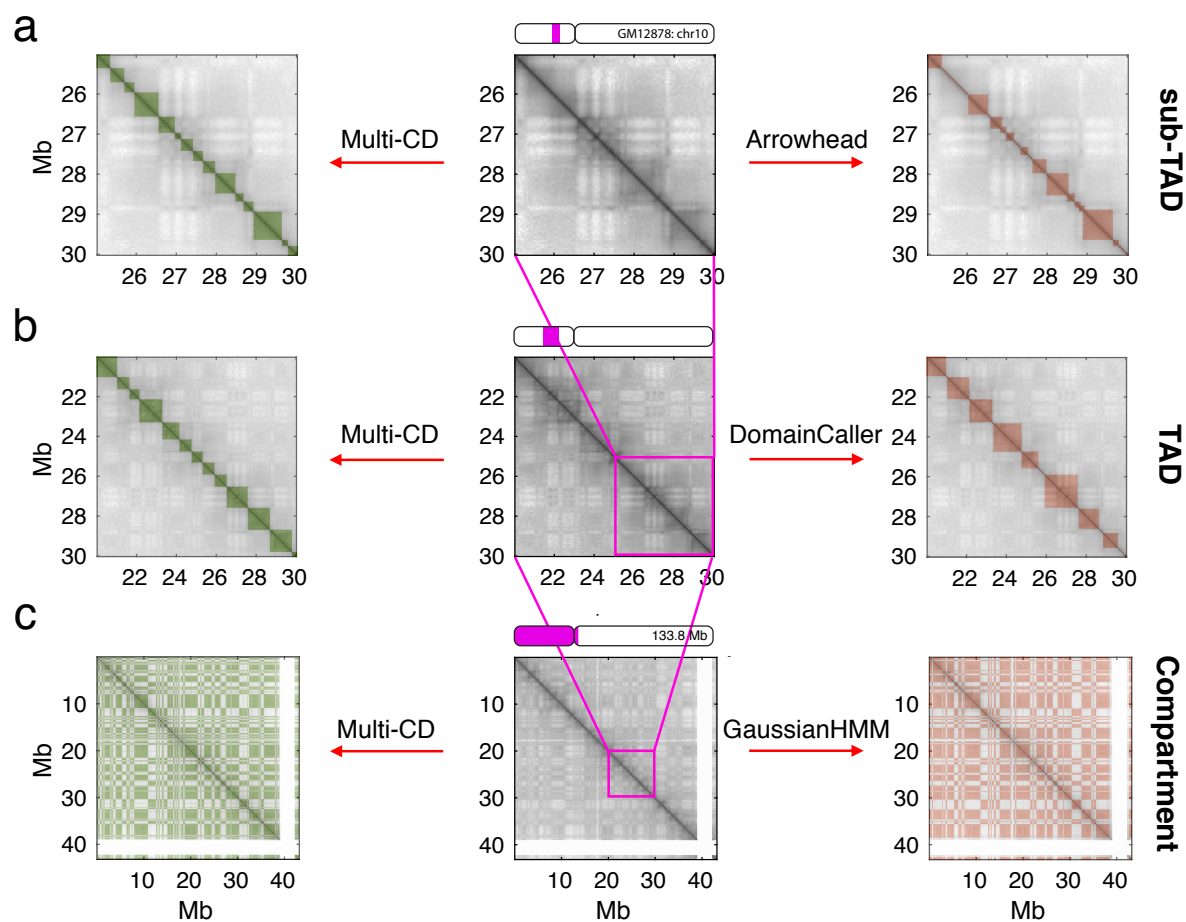

**Figure S5: CD solutions from Multi-CD and other algorithms.** Comparison between domain solutions obtained by three popular algorithms (ArrowHead, DomainCaller, GaussianHMM) (right column) and those by Multi-CD (left column), applied to 50 kb resolution Hi-C data. Three subsets from the same Hi-C data ( $\log_{10} M$ ), with different magnification (5, 10, and 40 Mb from top to bottom), are given in the middle column. ArrowHead algorithm [17] was used for identifying the domain structures of sub-TADs, DomainCaller [24] for TADs, and Gaussian Hidden Markov Model (GaussianHMM) [17] for compartments. Multi-CD use  $\lambda = 0, 10, 90$ , as the parameter values for identifying sub-TADs, TADs, and compartments, respectively.

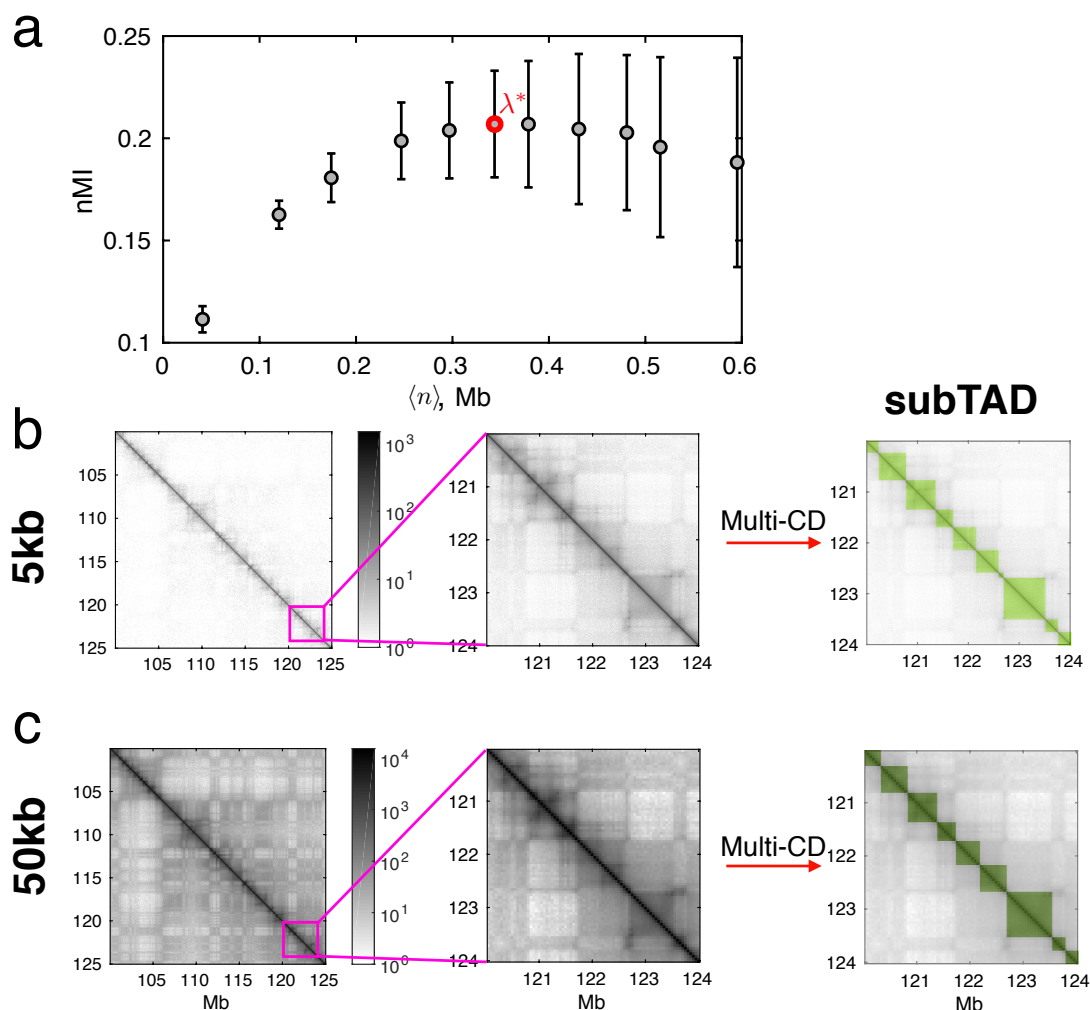

**Figure S6: Identification of sub-TAD boundaries at 5 kb resolution.** (a) The optimum cluster size, best describing 5 kb resolution Hi-C map in terms of nMI, is determined at  $\langle n \rangle = 0.35$  Mb, which is consistent with the sub-TAD size determined from 50 kb resolution Hi-C at  $\lambda = 0$ . (b-c) Comparison between Multi-CD solutions at different resolutions of the input Hi-C data, that point to the robustness of sub-TAD boundaries regardless of Hi-C resolution. (b) The best CD solution (corresponding to  $\lambda = \lambda^*$  in panel (a)) for the 5 kb-resolution Hi-C data in the 120-124 Mb region of the genome. (c) Solution for the same genomic interval from 50 kb Hi-C, determined at  $\lambda = 0$ . The two CD solutions are effectively identical, which supports our interpretation of sub-TAD as the unit of hierarchical chromosome organization.

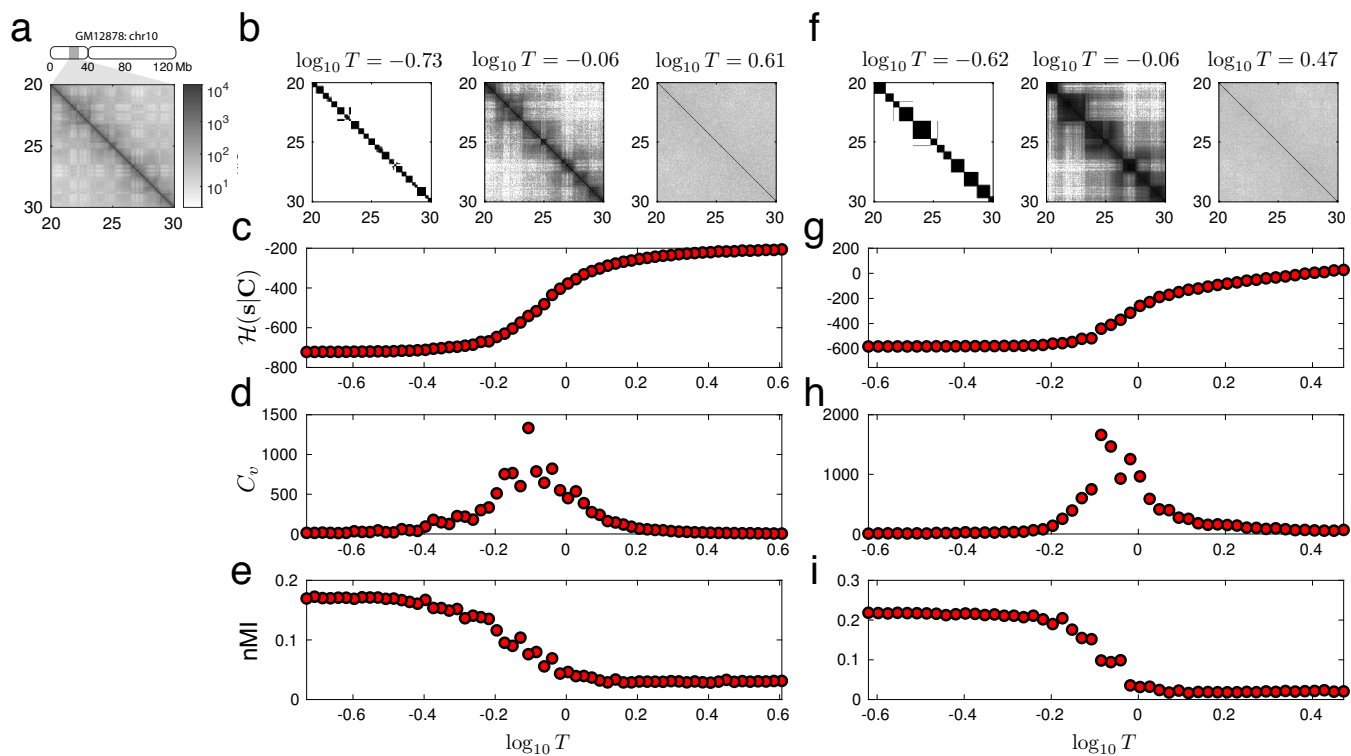

**Figure S7: Temperature trajectory of domain solutions by simulated annealing method.** (a) A subset of Hi-C data, covering 10 Mb genomic region on chr10 of GM12878. (b) CD solutions, obtained from the Hi-C data in (a), at three values of  $T$  for  $\lambda = 0$ . The CD solution at each  $T$  was constructed by 2,000 sample trajectories being equilibrated. (c-e) We plot three quantities over varying  $T$ , where the simulated annealing from high to low  $T$  (right to left in figure) was used as a sampling protocol. (c) The effective energy hamiltonian  $\mathcal{H}(s|C)$ . (d) The heat capacity  $C_v = \langle \delta \mathcal{H}^2 \rangle / T^2$ . (e) The normalized mutual information (nMI) between the domain solution and Hi-C matrix ( $\log_{10} M$ ). (f-i) Same analyses repeated for  $\lambda = 10$ .

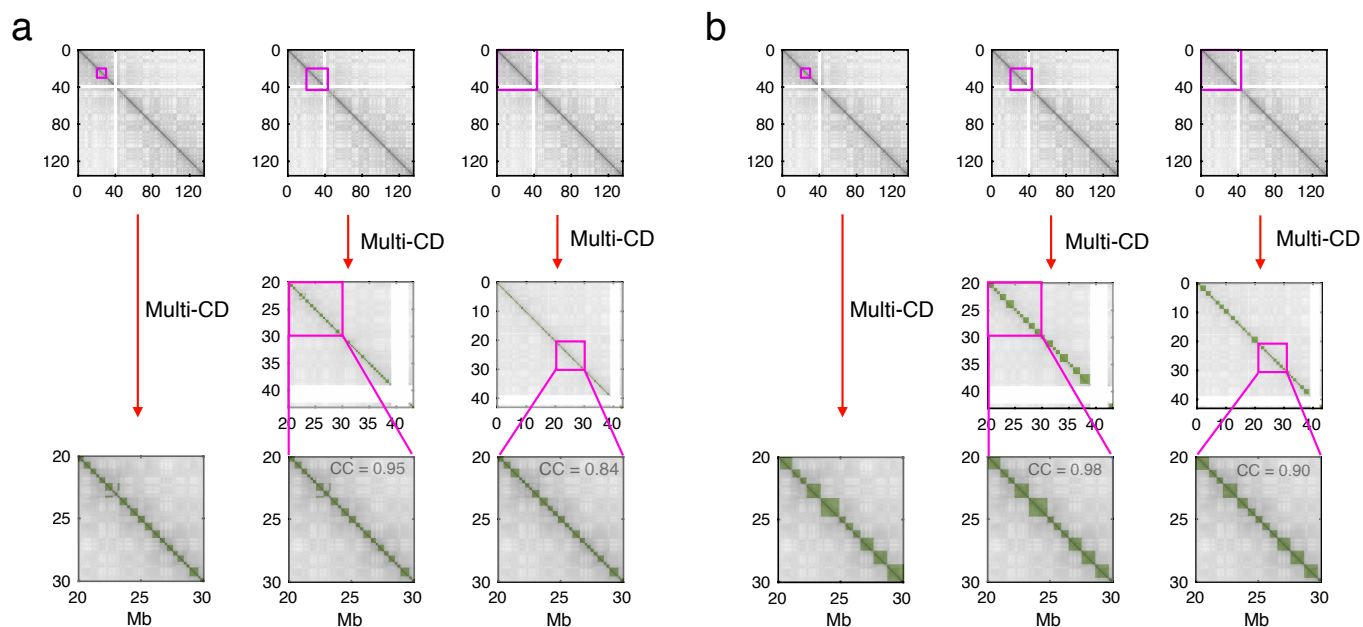

**Figure S8: Domain solutions from Hi-C inputs with different size.** Multi-CD is confirmed to be *locality-preserving*. That is, the sets of domain solutions determined from Hi-C inputs with different sizes remain almost identical to each other. The Hi-C data demarcated by the purple squares on the top panels are the input data used for Multi-CD analysis. The three panels from left to right on the bottom are the domain solutions from 10 Mb, 20 Mb, and 40 Mb Hi-C inputs. (a) For  $\lambda = 0$ , the correlation coefficients of 20 Mb Hi-C and 40 Mb Hi-C generated domain solutions with respect to the 10 Mb Hi-C generated one is 0.95 and 0.84, respectively. (b) Same calculations were carried out for  $\lambda=10$ .

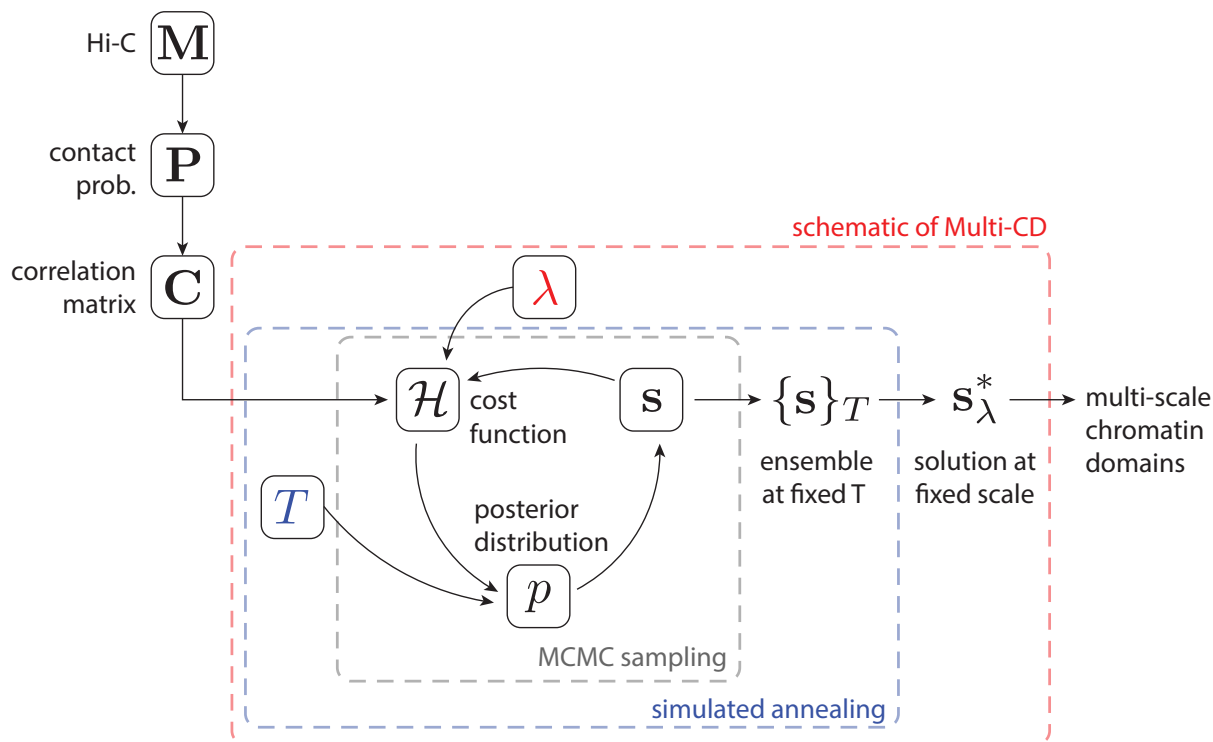

**Figure S9: Schematic of the Multi-CD algorithm.** The diagram illustrates the three levels of iterations in Multi-CD. Ultimately, Multi-CD identifies a family of chromatin domains at multiple scales as the control parameter  $\lambda$  is varied. At each fixed  $\lambda$ , the best domain solution is found through a simulated annealing, in which the effective temperature  $T$  is gradually decreased. At each fixed  $T$ , the tempered posterior distribution is approximated by the Markov chain Monte Carlo method, which samples multiple domain solutions,  $\mathbf{s}$ , according to the posterior distribution  $p(\mathbf{s}|\mathbf{C}) \propto \exp(-\mathcal{H}(\mathbf{s}|\mathbf{C}; \lambda)/T)$ .
